# Supplementary material for: Inhibitory Evaluation of Sulfonamide Chalcones on β-Secretase and Acylcholinesterase
Source: PubMed Central journal article supplement (PMC6270012; doi:10.3390/molecules18010140), 2012-12-21

## Supplementary Materials

### Experimental Section & Characterization Data

- ▶ Spectroscopic data of the compounds (1–7) -----S2–S18
- ▶ BACE1 kinetic data of the compounds (1–5) -----S19–S22
- ▶ Cholinesterase kinetic data of the compounds (4a,f, 5b,d) -----S23-S24

**Spectra 1.**  $^1\text{H-NMR}$  of 4'-amino-4-hydroxychalcone (1).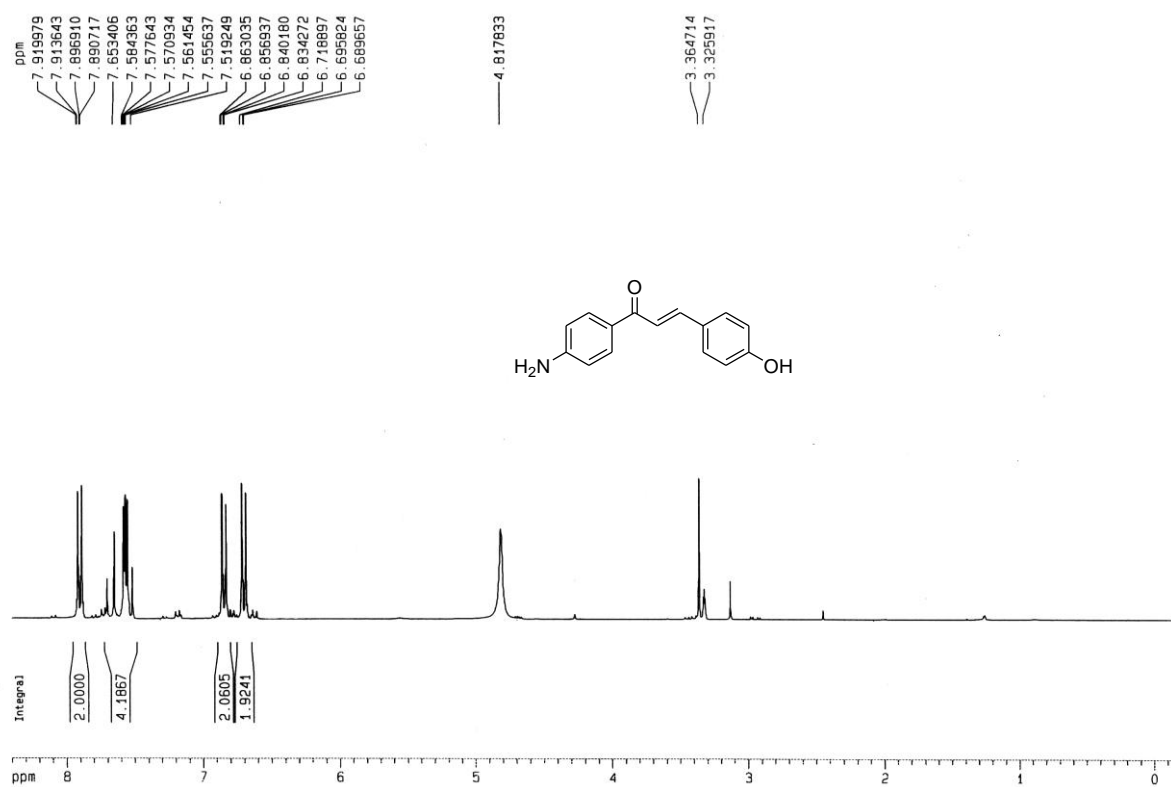**Spectra 2.**  $^{13}\text{C-NMR}$  of 4'-amino-4-hydroxychalcone (1).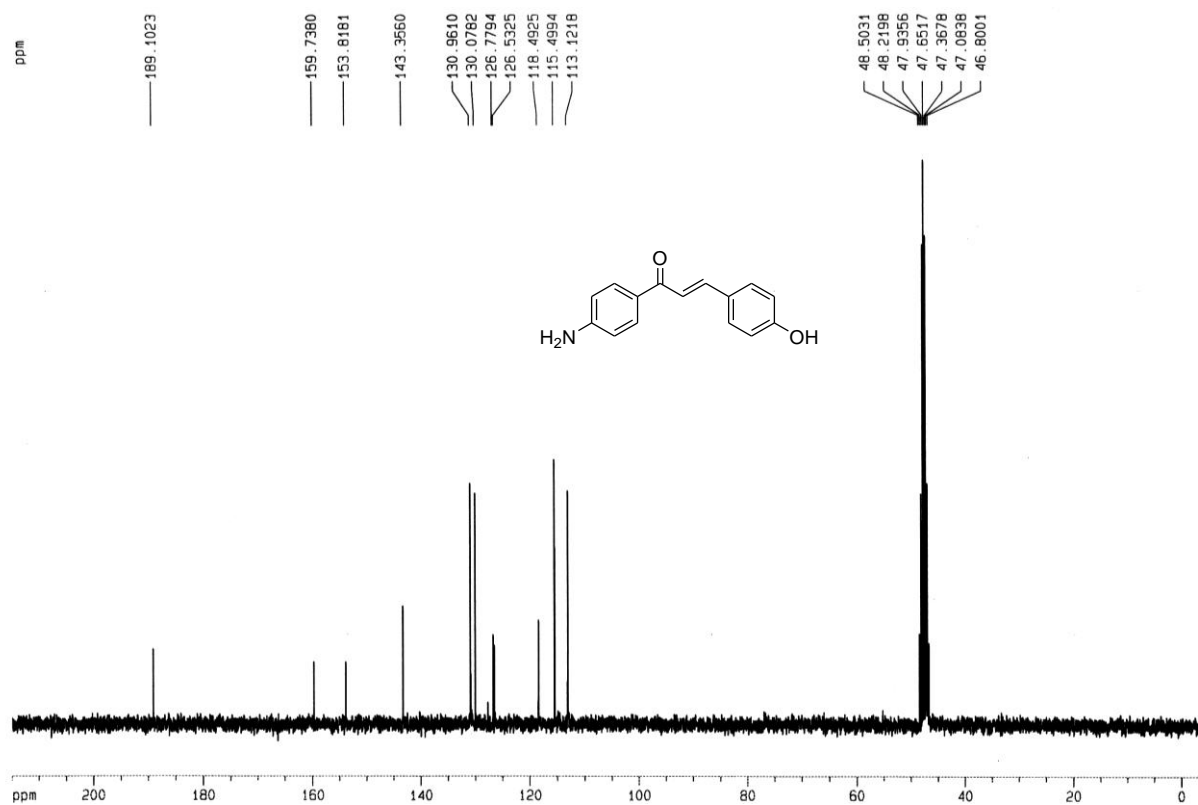

**Spectra 3.**  $^1\text{H-NMR}$  of 4'-amino-3,4-dihydroxychalcone (2).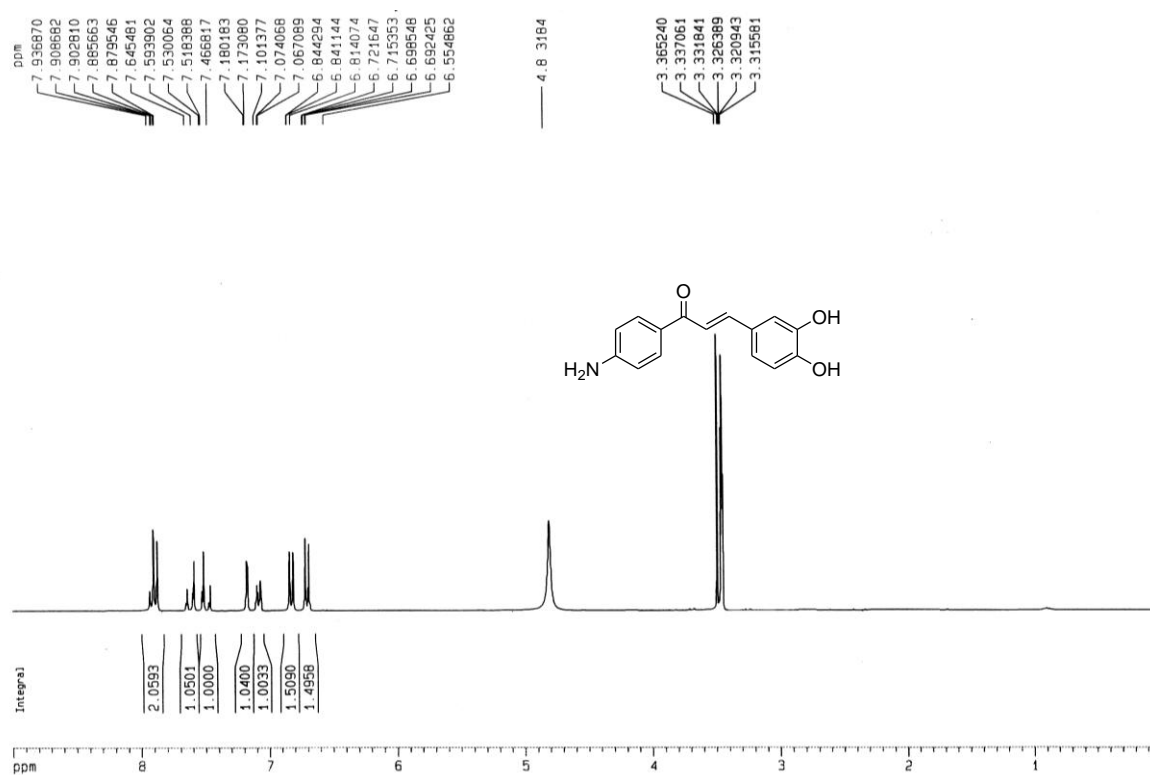**Spectra 4.**  $^{13}\text{C-NMR}$  of 4'-amino-3,4-dihydroxychalcone (2).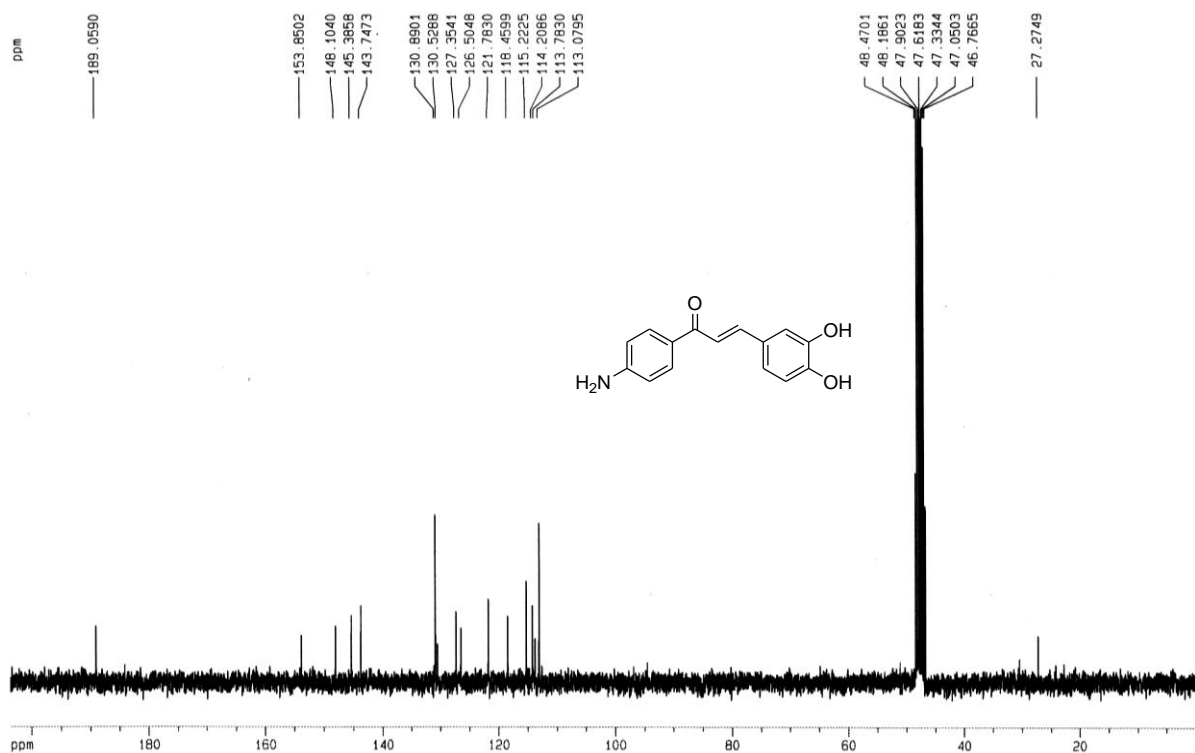

**Spectra 5.**  $^1\text{H-NMR}$  of 4'-acetamido-4-hydroxychalcone (**3**).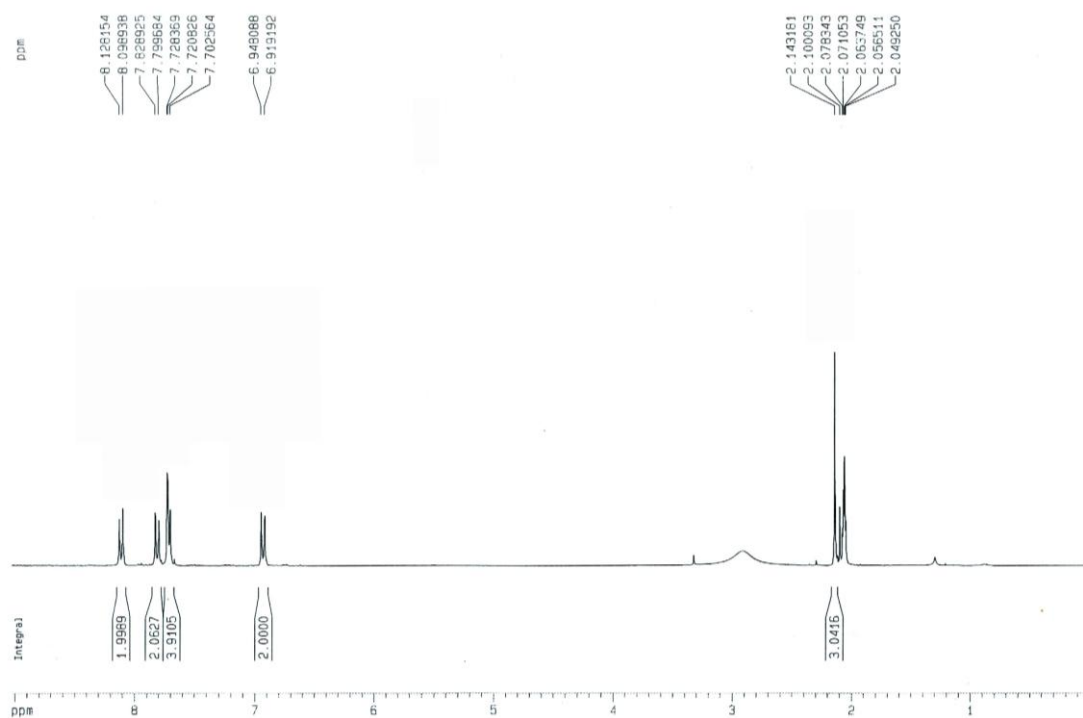**Spectra 6.**  $^{13}\text{C-NMR}$  of 4'-acetamido-4-hydroxychalcone (**3**).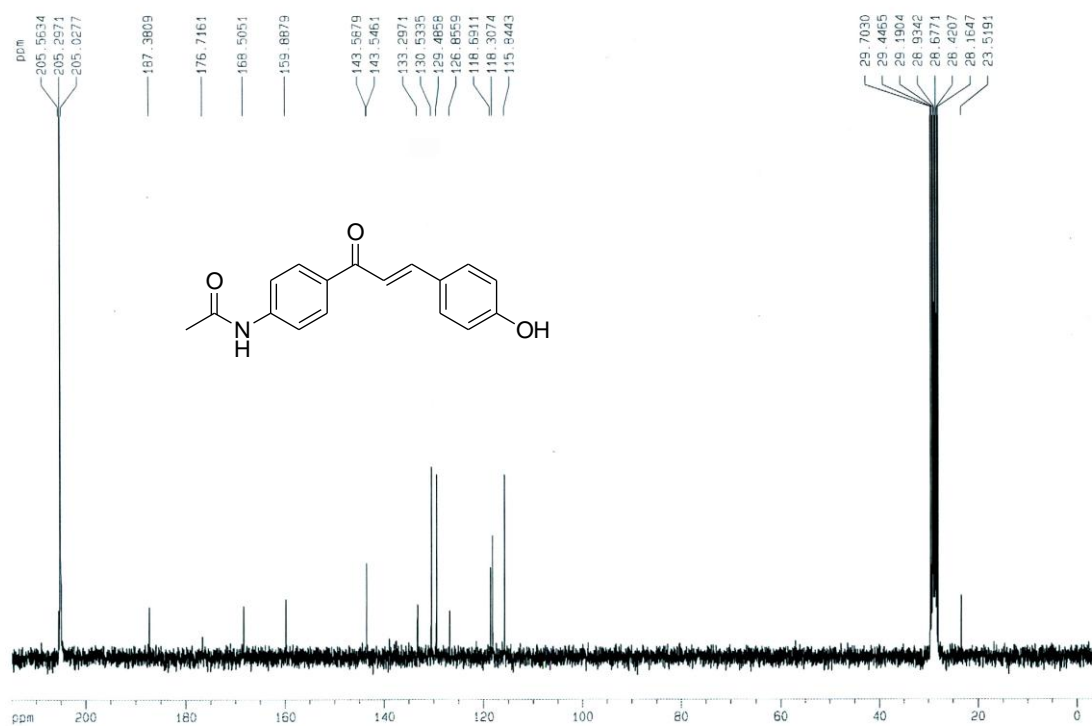

**Spectra 7.**  $^1\text{H-NMR}$  of 4'-(*p*-toluenesulfonamide)-4-hydroxychalcone (**4a**).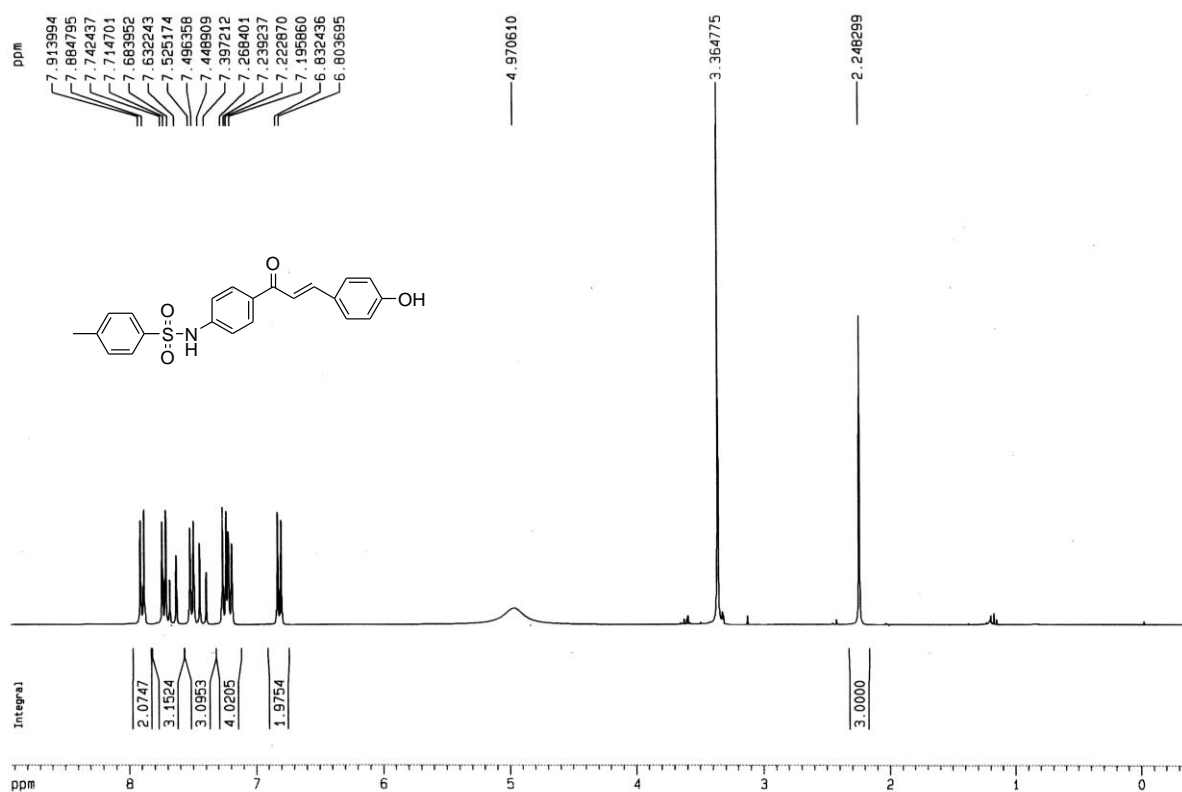**Spectra 8.**  $^{13}\text{C-NMR}$  of 4'-(*p*-toluenesulfonamide)-4-hydroxychalcone (**4a**).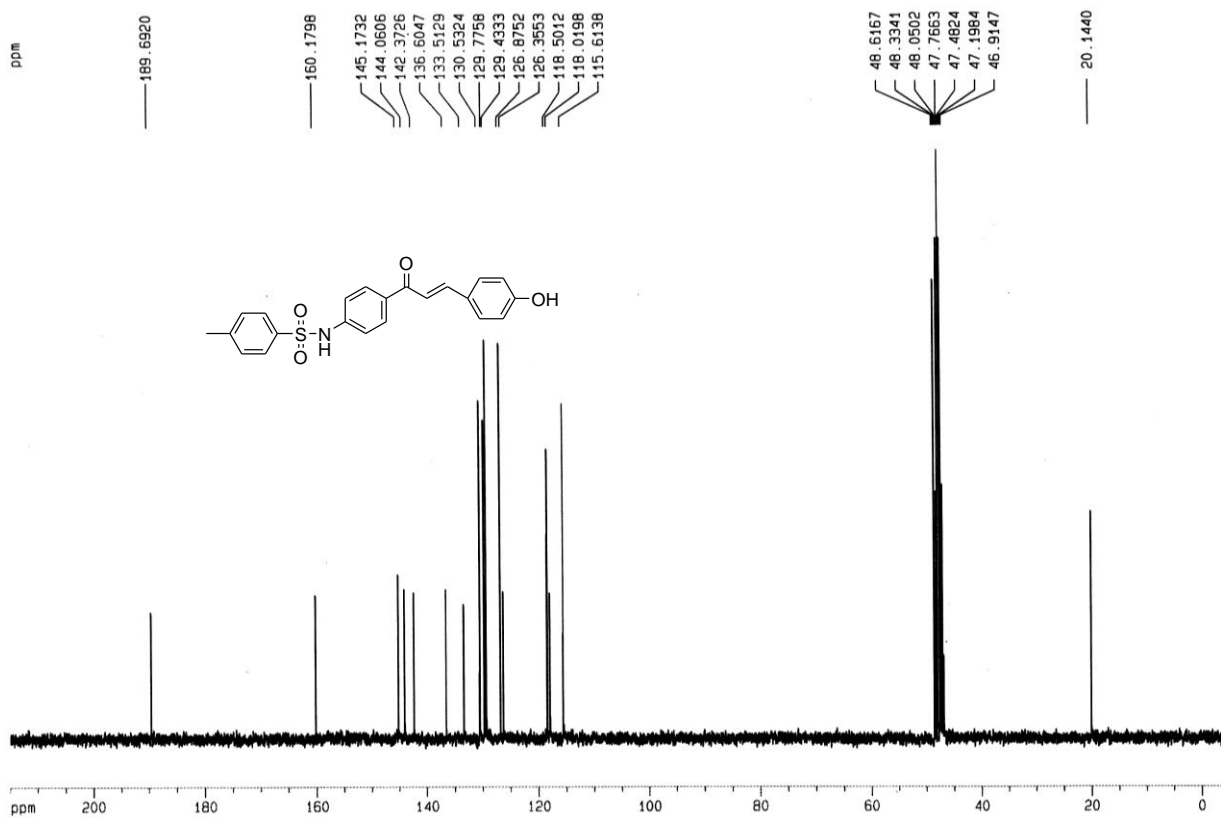

**Spectra 9.**  $^1\text{H-NMR}$  of 4'-(4-toluenesulfonamide)-chalcone (**4b**).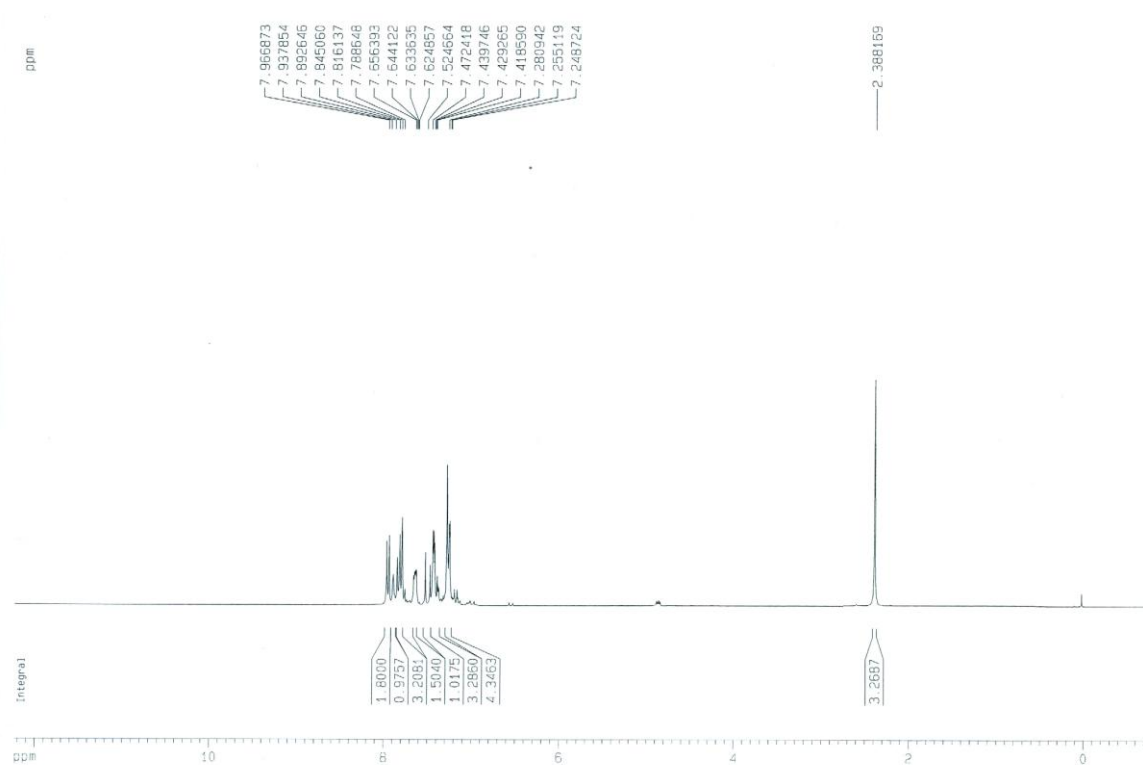**Spectra 10.**  $^{13}\text{C-NMR}$  of 4'-(4-toluenesulfonamide)-chalcone (**4b**).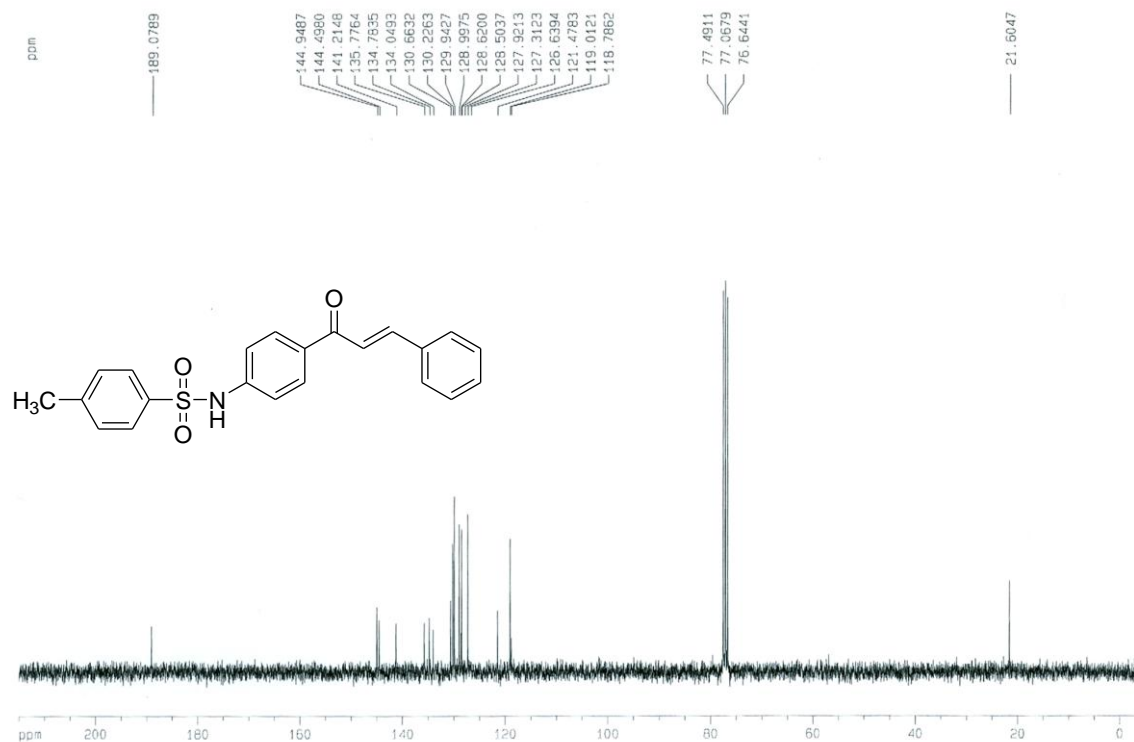

**Spectra 11.**  $^1\text{H-NMR}$  of 4'-(benzenesulfonamide)-4-hydroxychalcone (**4c**).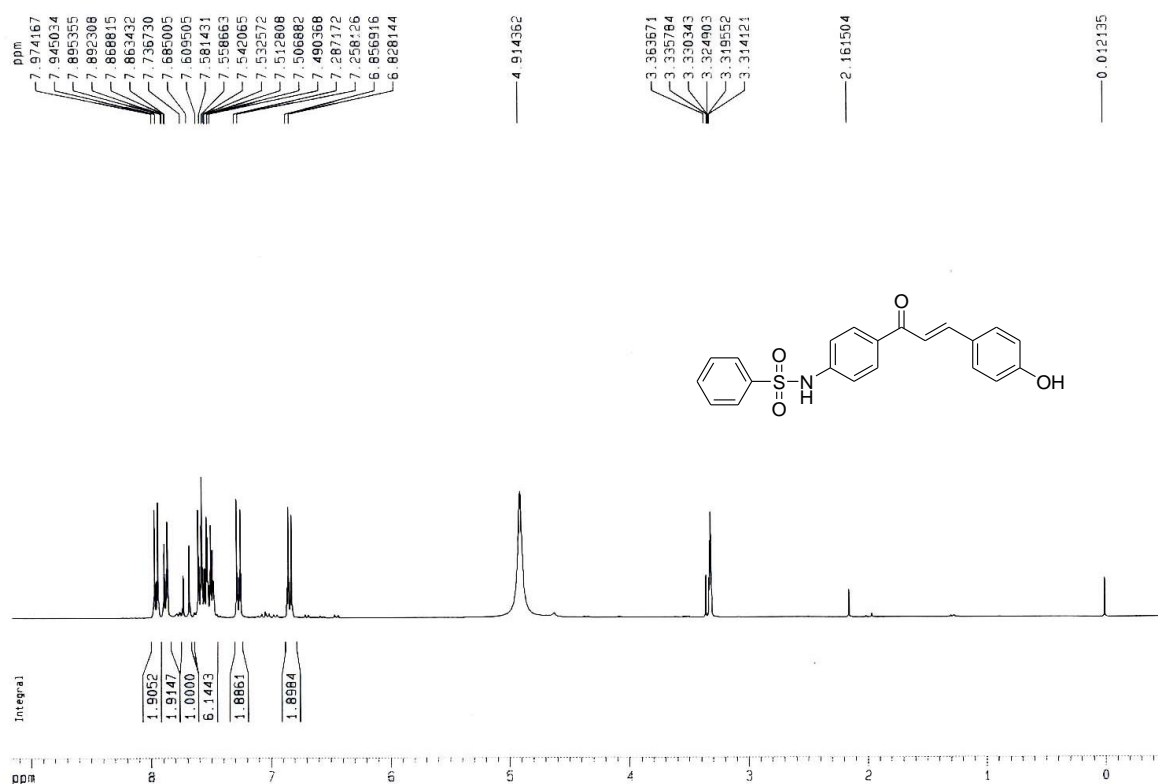**Spectra 12.**  $^{13}\text{C-NMR}$  of 4'-(benzenesulfonamide)-4-hydroxychalcone (**4c**).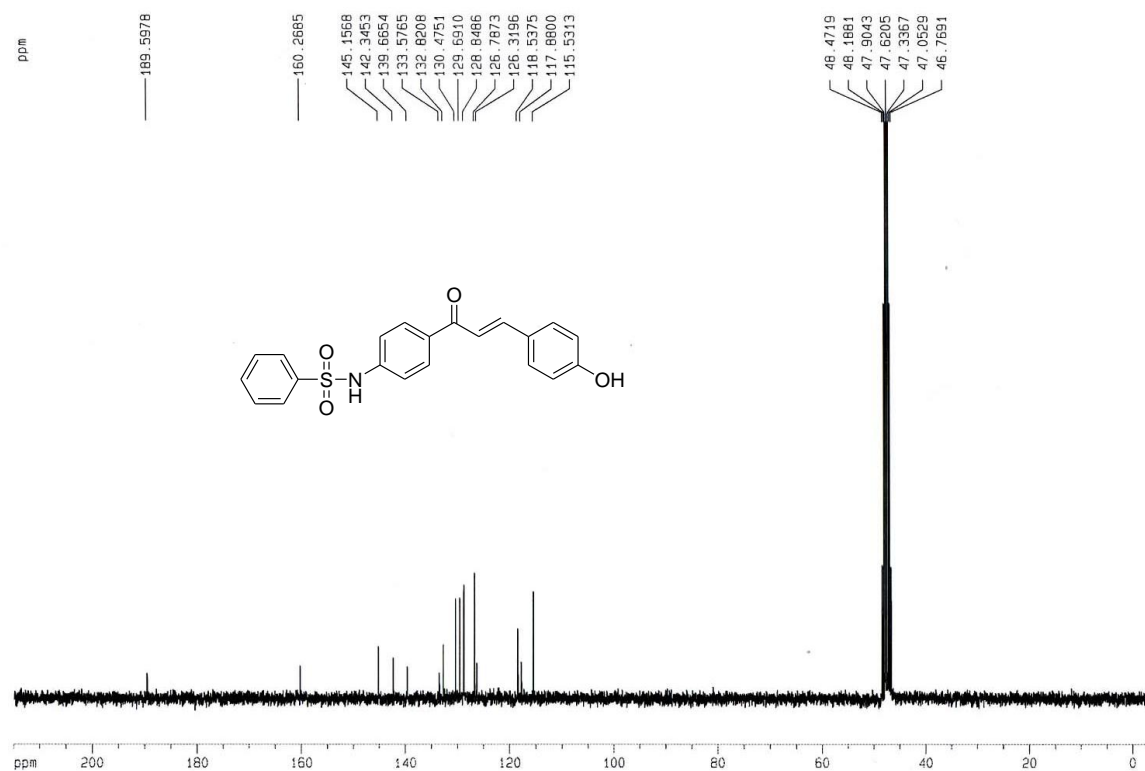

**Spectra 13.**  $^1\text{H-NMR}$  of 4'-(4-hydroxybenzenesulfonamide)-4-hydroxychalcone (**4d**).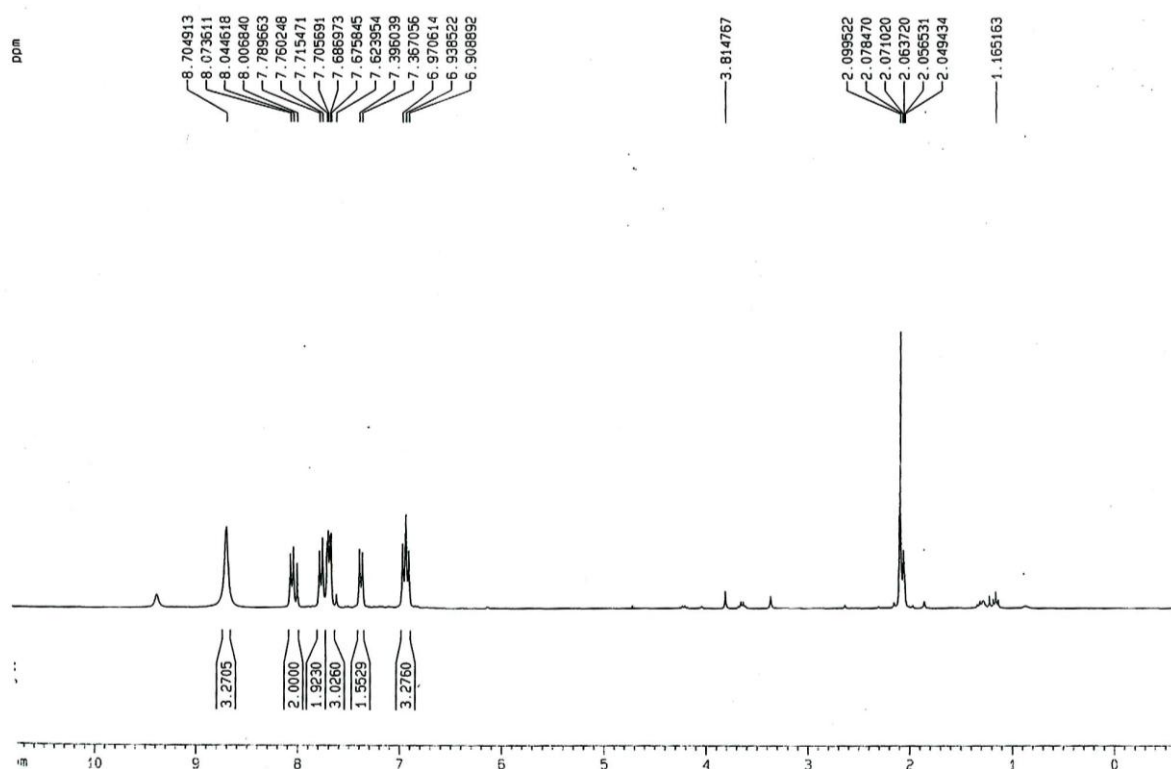**Spectra 14.**  $^{13}\text{C-NMR}$  of 4'-(4-hydroxybenzenesulfonamide)-4-hydroxychalcone (**4d**).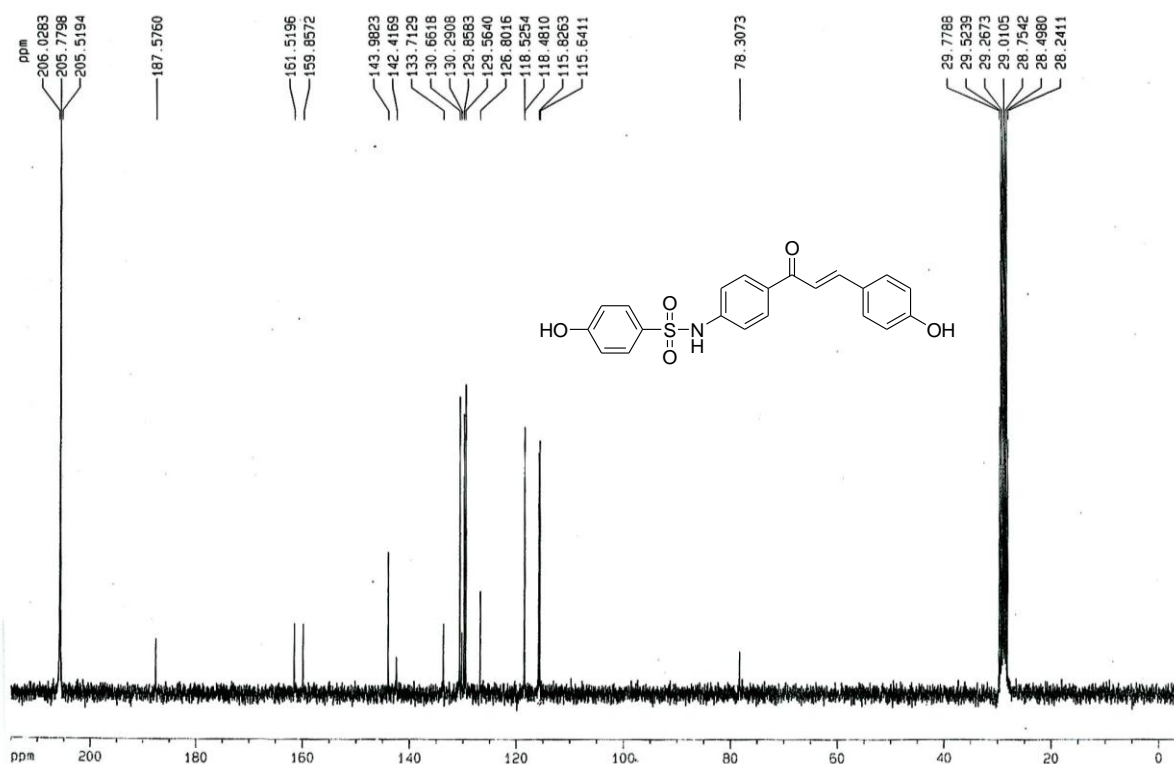



**Spectra 15.**  $^1\text{H-NMR}$  of 4'-(4-methoxybenzenesulfonamido)-4-hydroxychalcone (**4e**).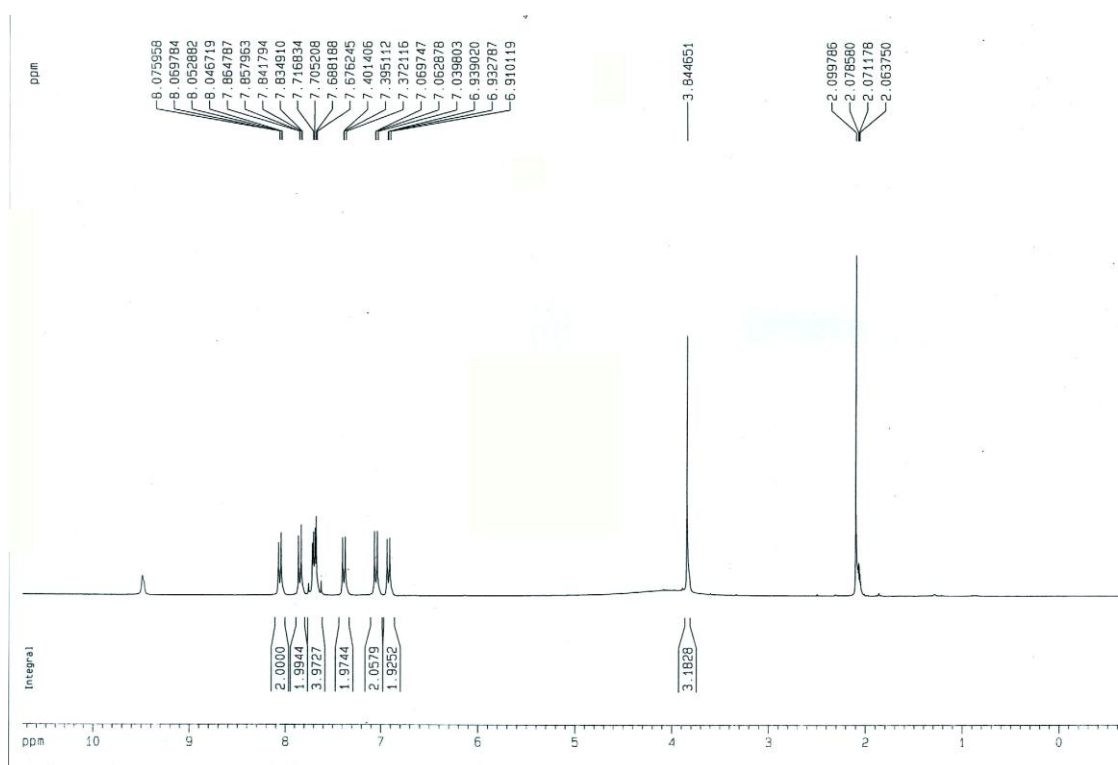**Spectra 16.**  $^{13}\text{C-NMR}$  of 4'-(4-methoxybenzenesulfonamido)-4-hydroxychalcone (**4e**).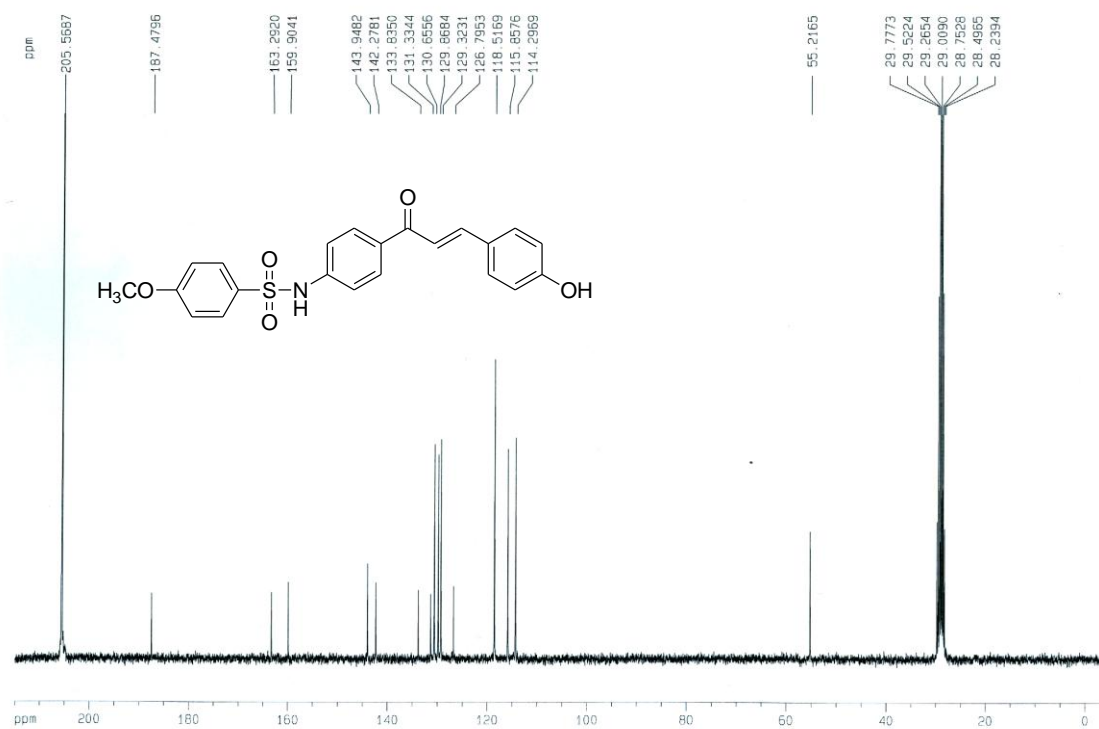

**Spectra 17.**  $^1\text{H-NMR}$  of 4'-(4-aminobenzensulfonamide)-4-hydroxychalcone (**4f**).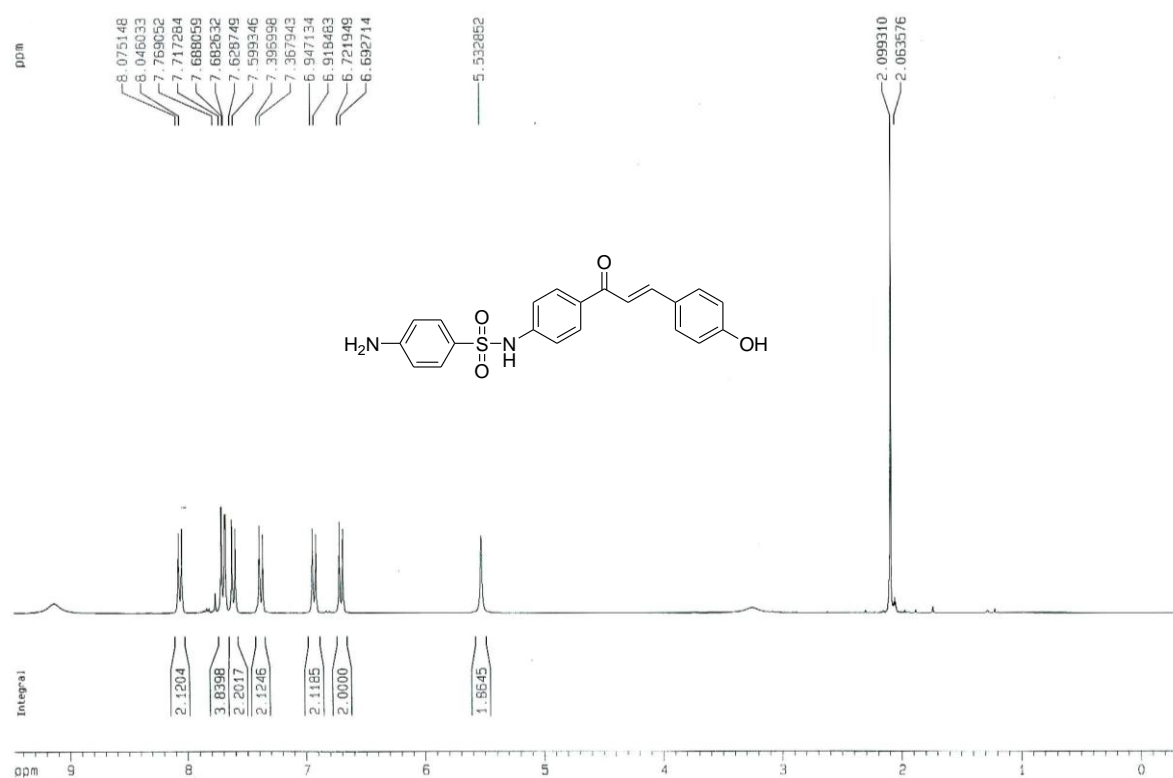**Spectra 18.**  $^{13}\text{C-NMR}$  of 4'-(4-aminobenzensulfonamide)-4-hydroxychalcone (**4f**).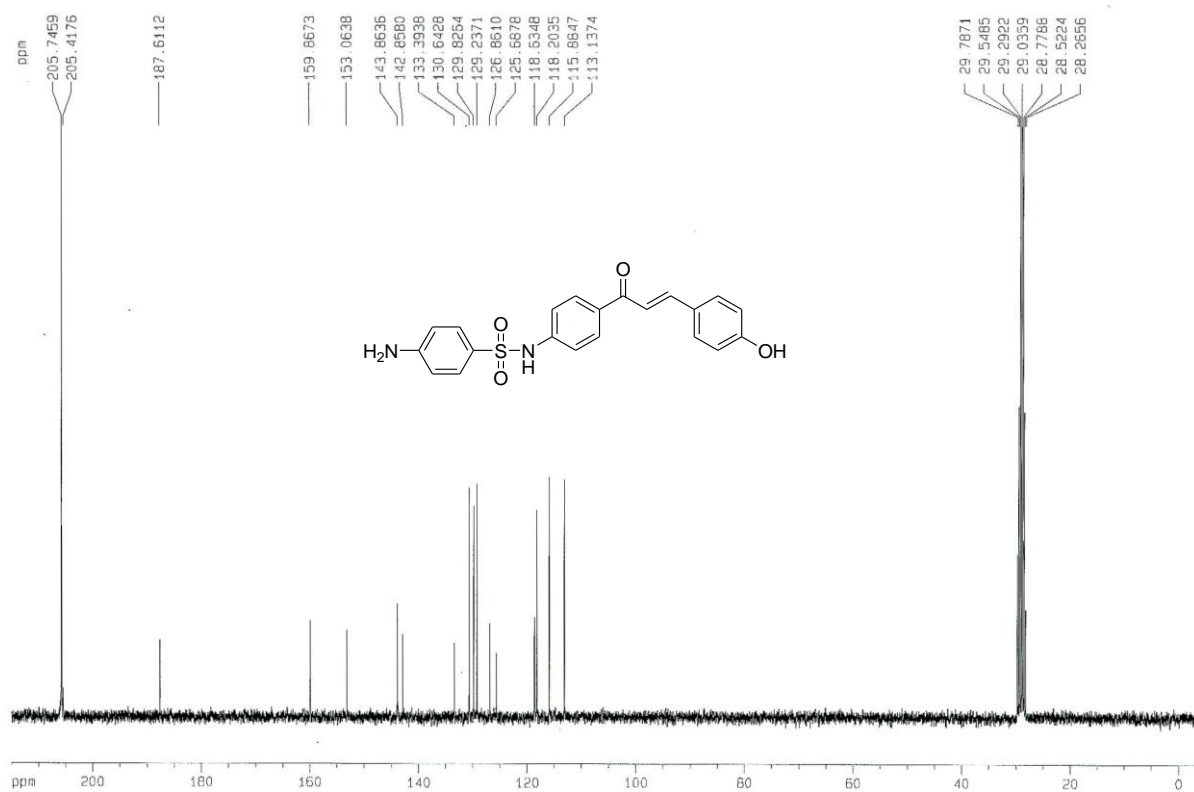

**Spectra 19.**  $^1\text{H-NMR}$  of 4'-(4-nitrobenzenesulfonamide)-4-hydroxychalcone (**4g**).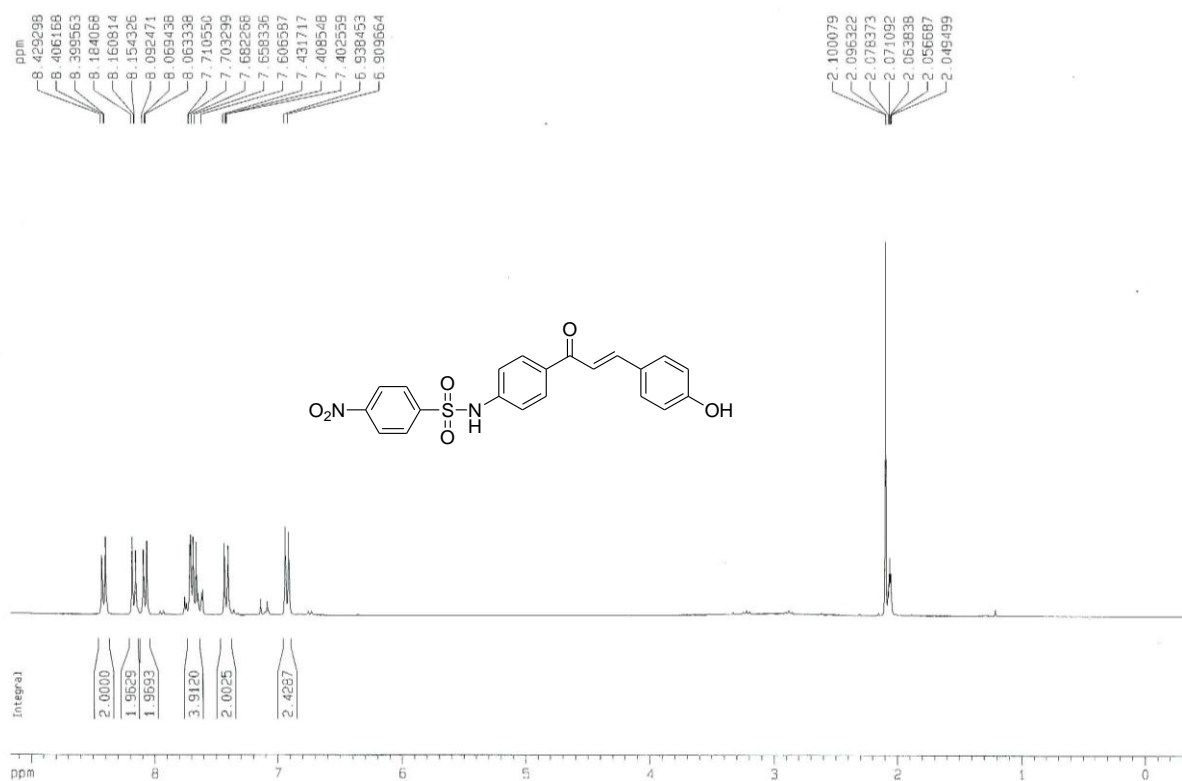**Spectra 20.**  $^{13}\text{C-NMR}$  of 4'-(4-nitrobenzenesulfonamide)-4-hydroxychalcone (**4g**).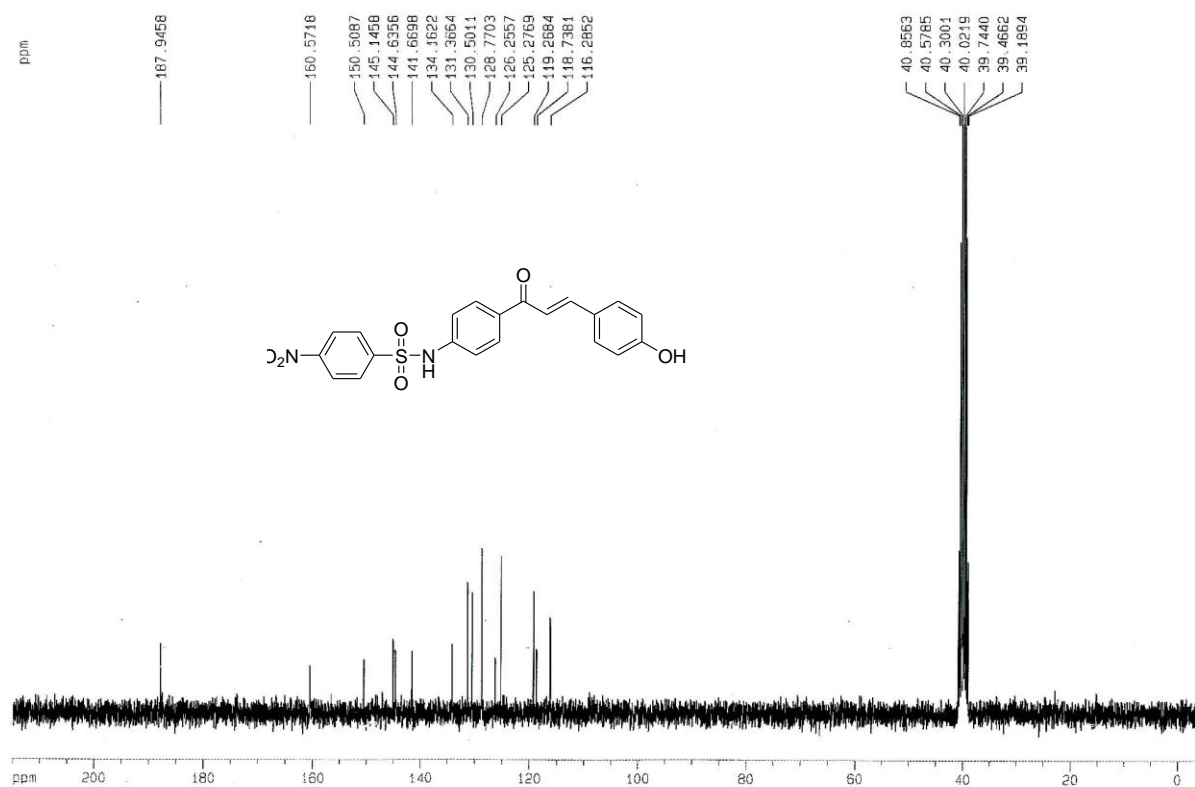

**Spectra 21.**  $^{13}\text{C}$ -NMR of 4'-(4-fluorobenzensulfonamide)-4-hydroxychalcone (**4h**).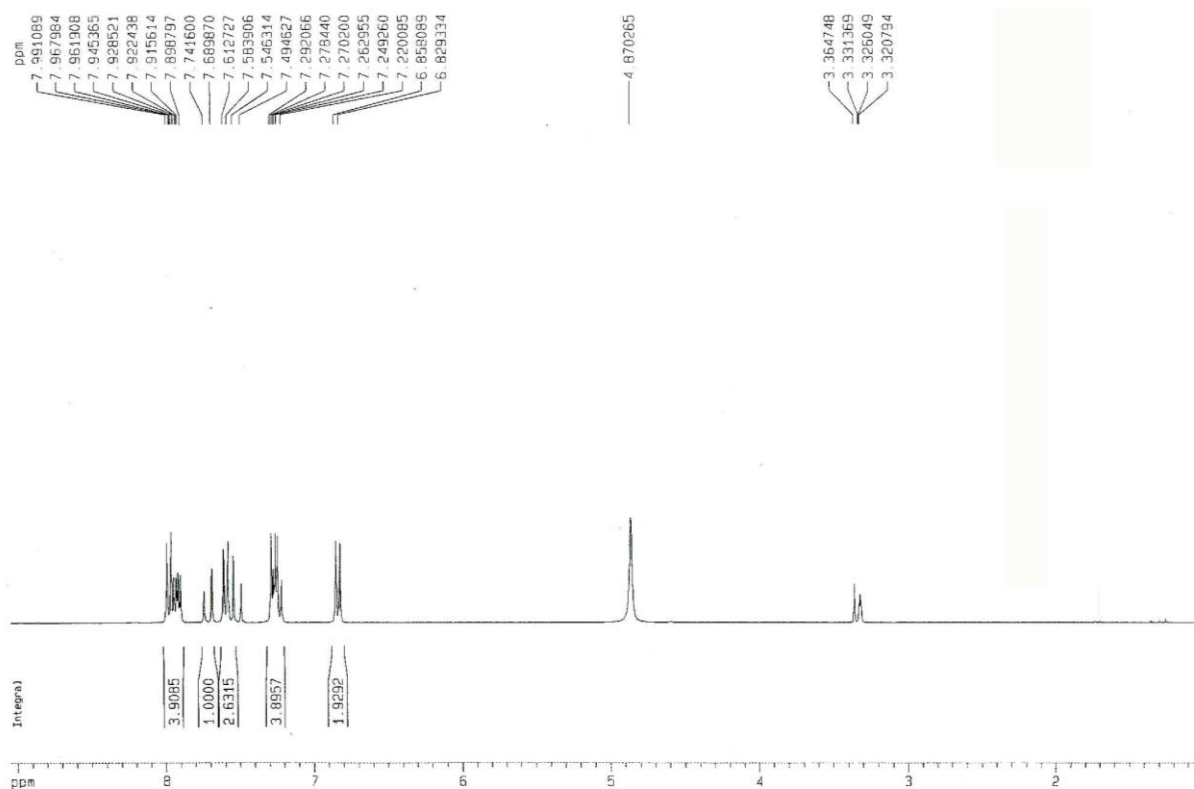**Spectra 22.**  $^{13}\text{C}$ -NMR of 4'-(4-fluorobenzensulfonamide)-4-hydroxychalcone (**4h**).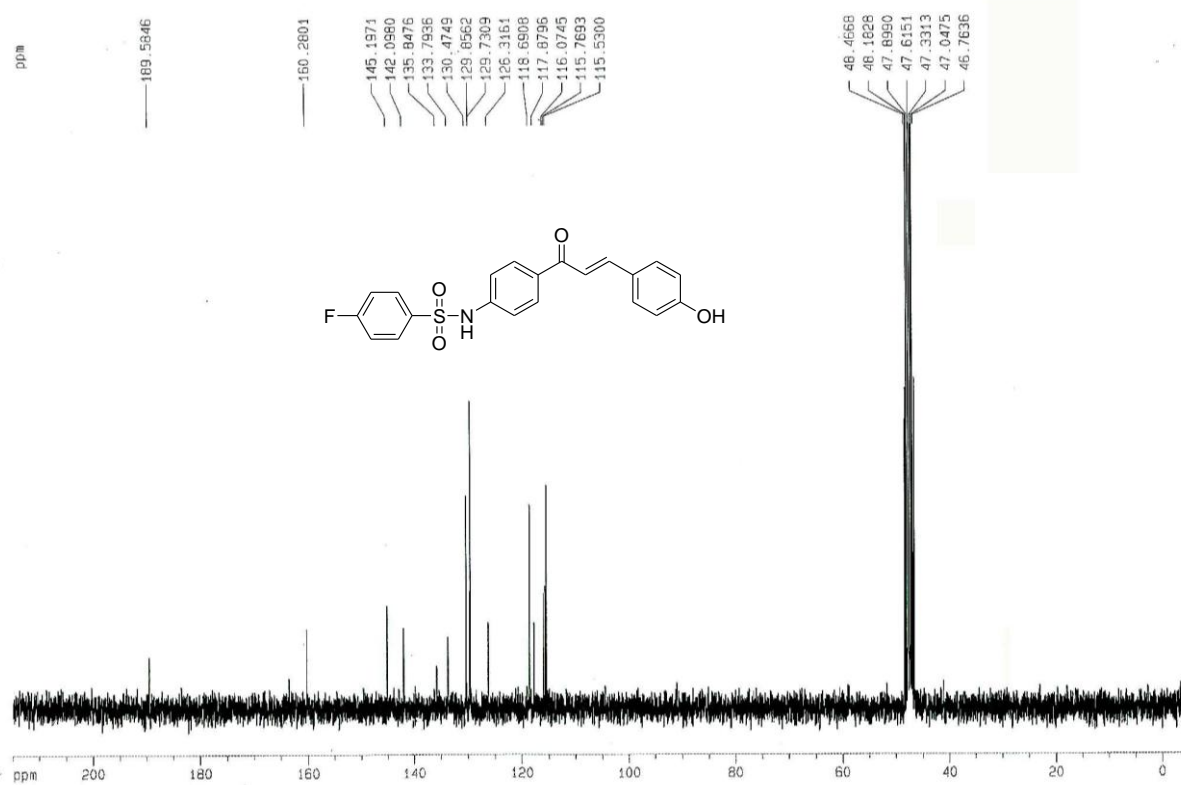

**Spectra 23.**  $^1\text{H-NMR}$  of 4'-(*p*-toluenesulfonamide)-3,4-dihydroxychalcone (**5a**).

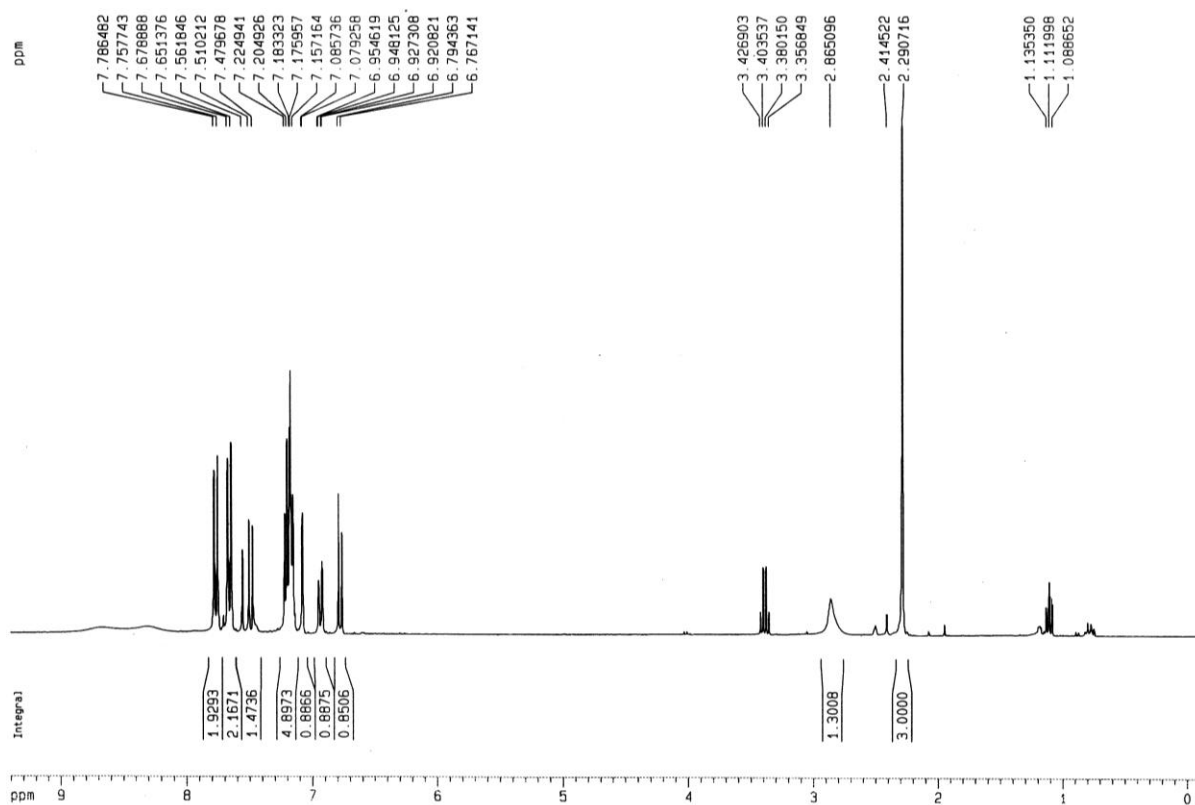

**Spectra 24.**  $^{13}\text{C-NMR}$  of 4'-(*p*-toluenesulfonamide)-3,4-dihydroxychalcone (**5a**).

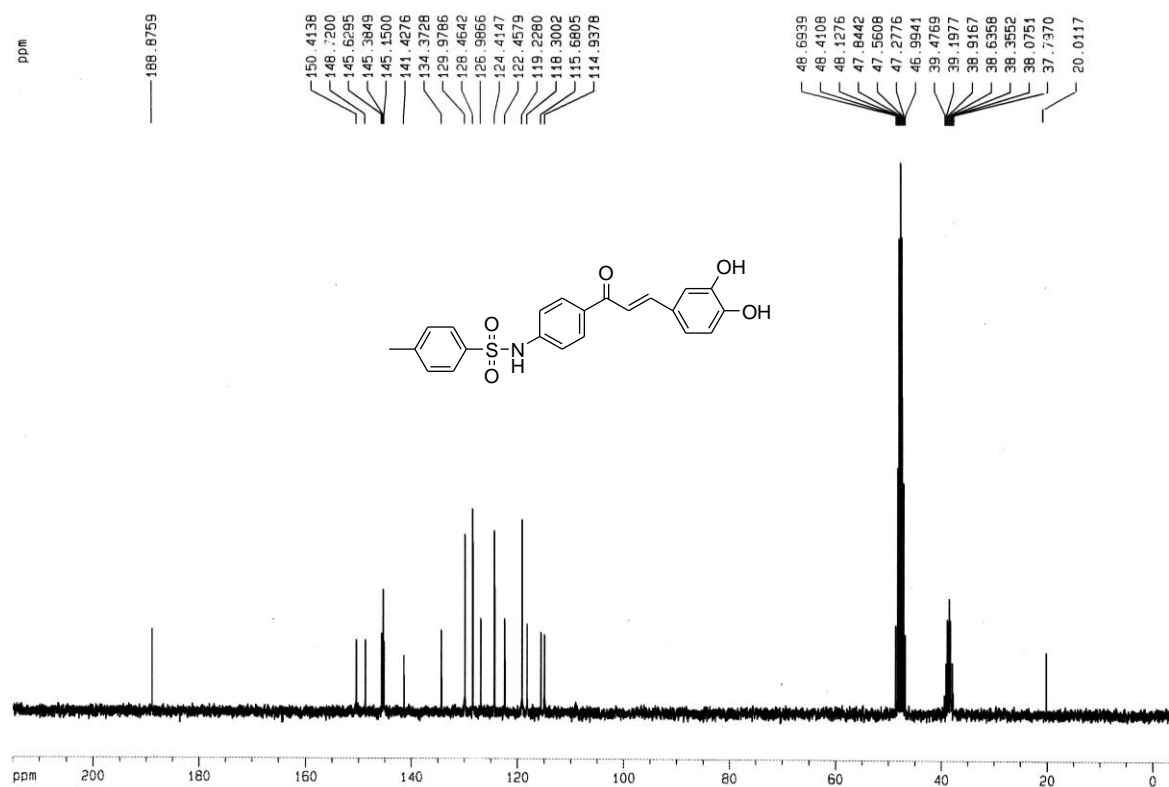

**Spectra 25.**  $^1\text{H-NMR}$  of 4'-(benzenesulfonamide)-3,4-dihydroxychalcone (**5b**).

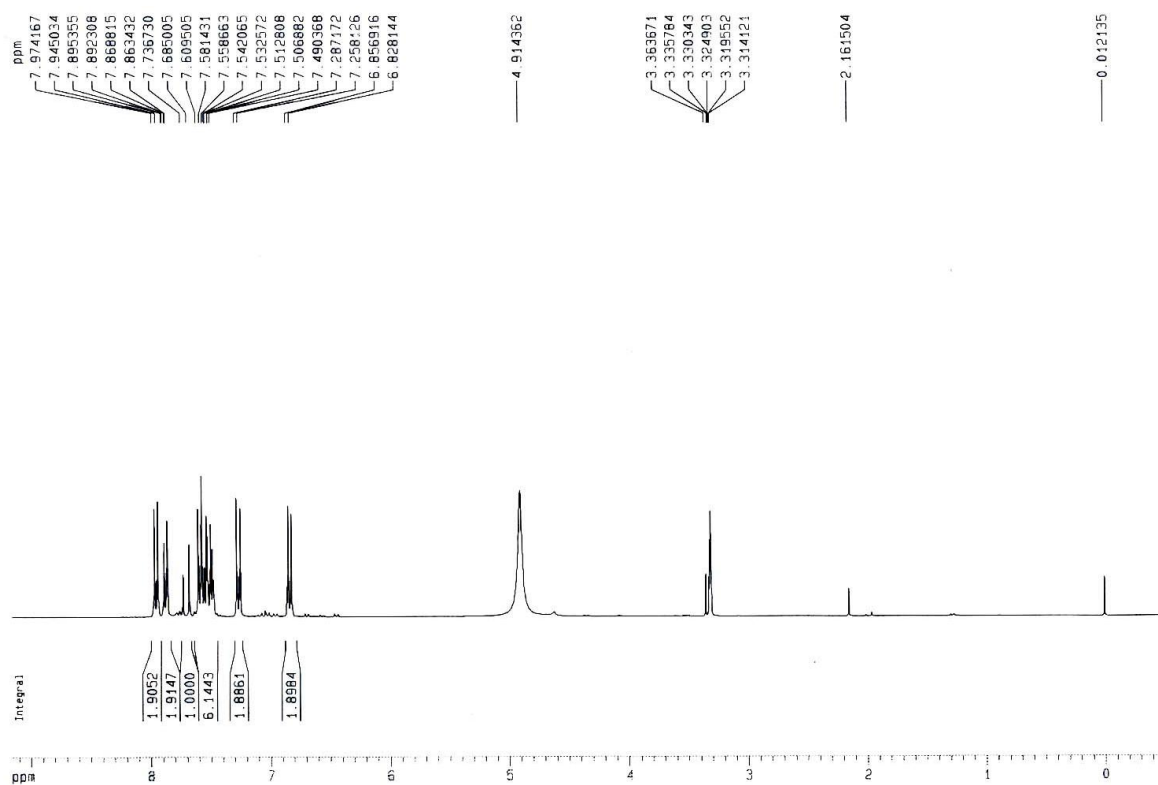

**Spectra 26.**  $^{13}\text{C-NMR}$  of 4'-(benzenesulfonamide)-3,4-dihydroxychalcone (**5b**).

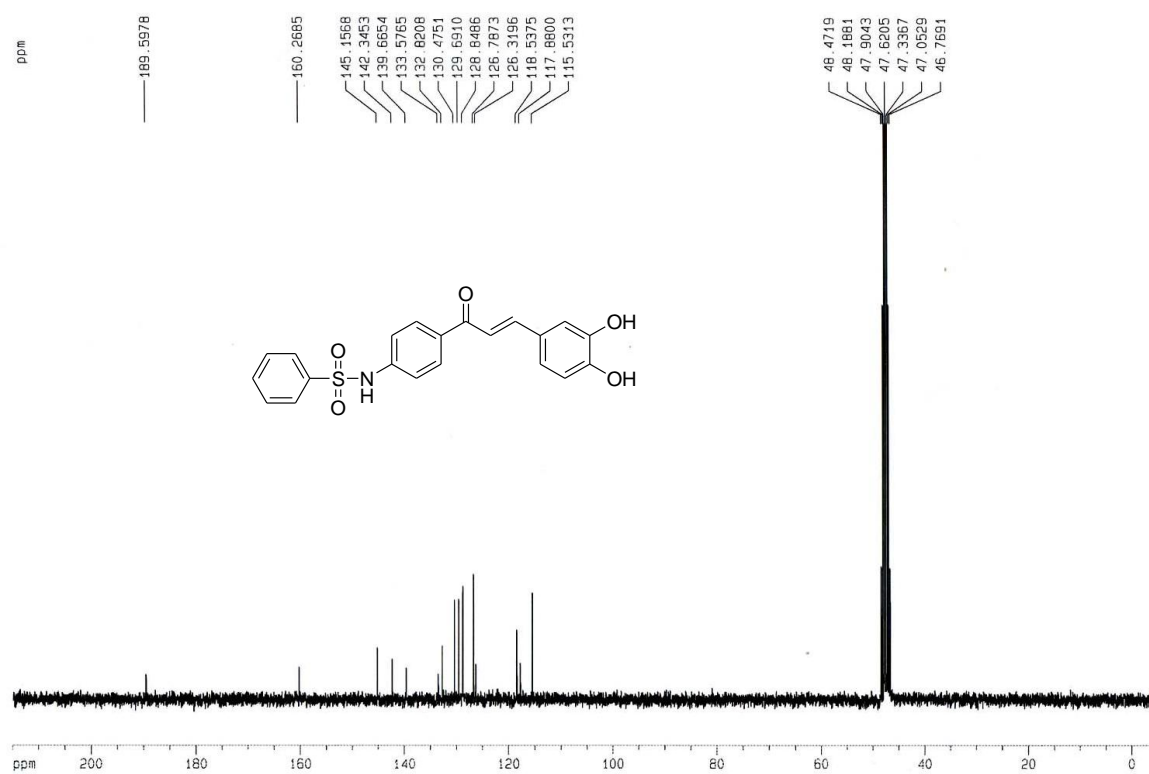

**Spectra 27.**  $^1\text{H-NMR}$  of 4'-(4-aminobenzensulfonamide)-3,4-dihydroxychalcone (**5d**).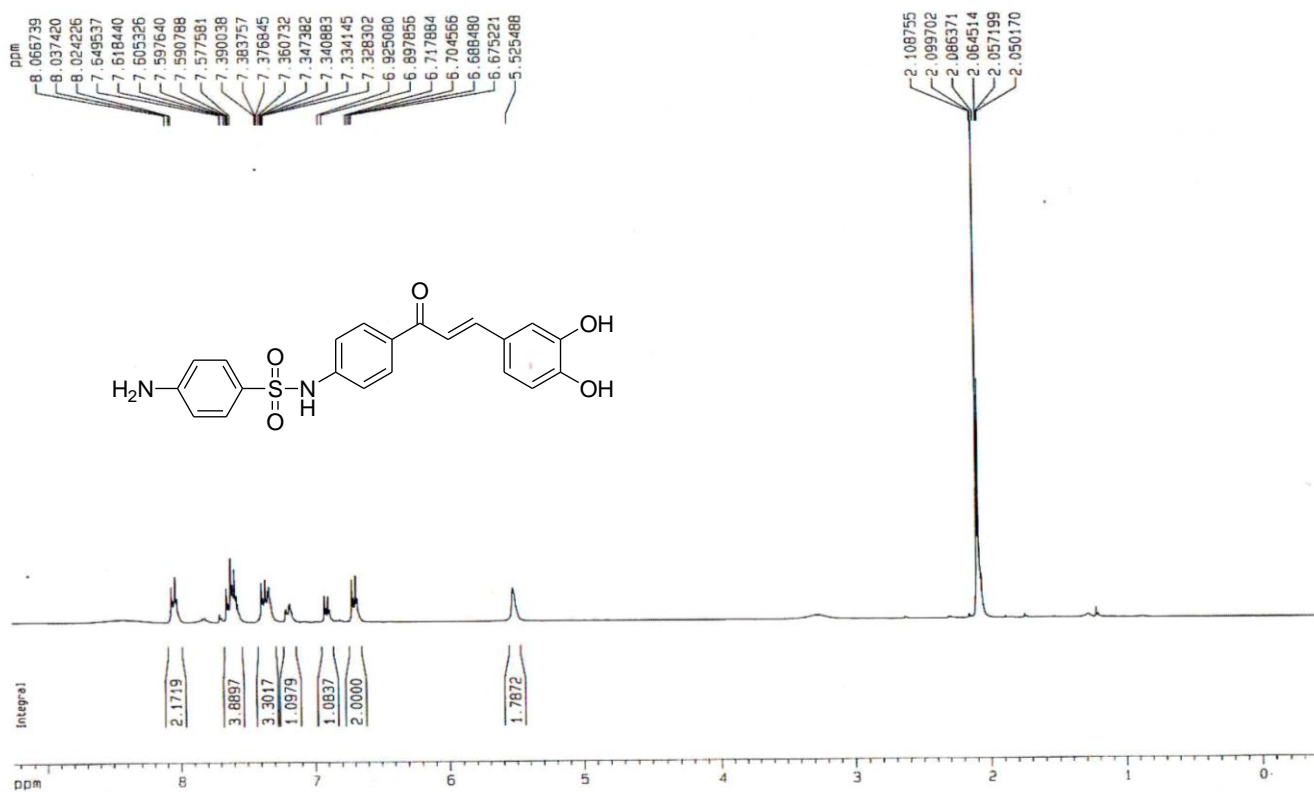**Spectra 28.**  $^{13}\text{C-NMR}$  of 4'-(4-aminobenzensulfonamide)-3,4-dihydroxychalcone (**5d**).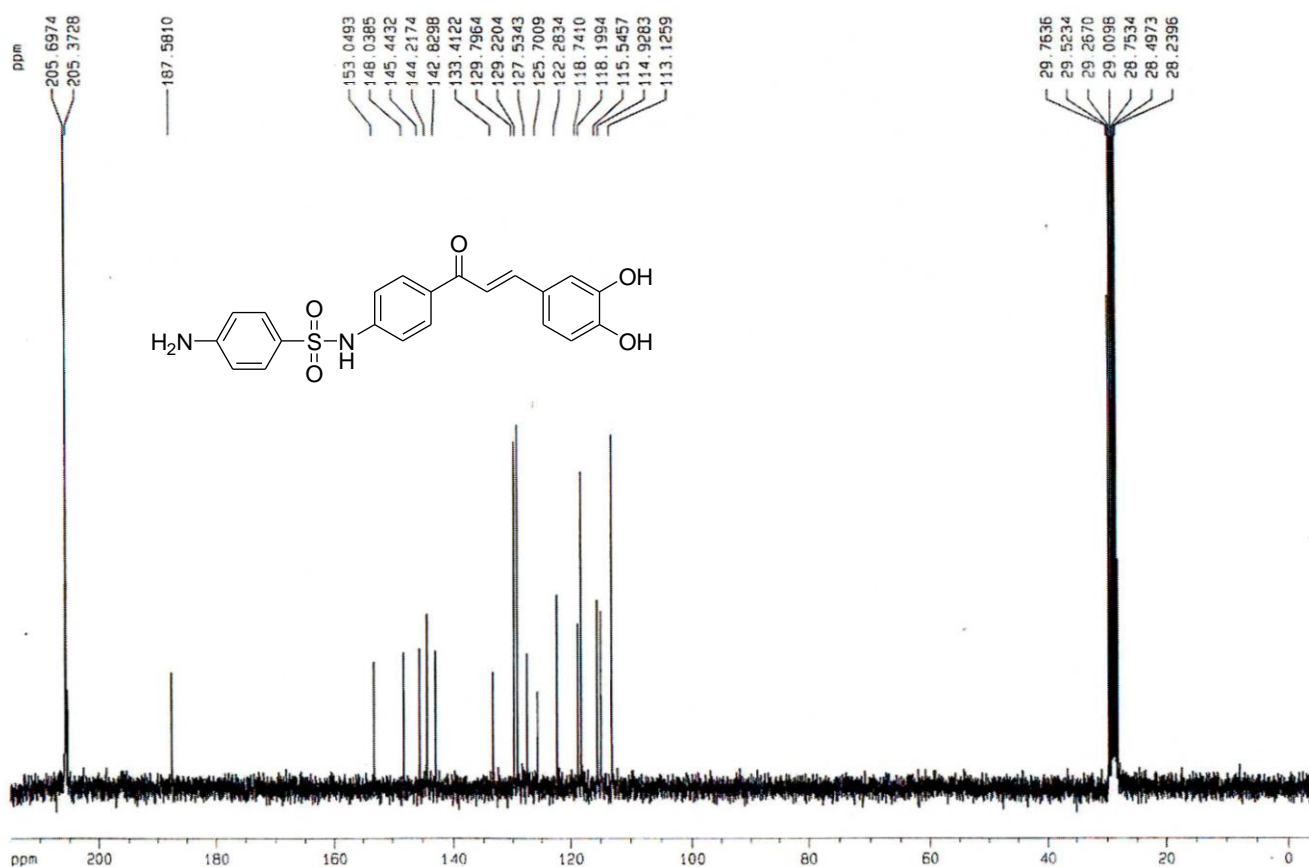

**Spectra 29.**  $^1\text{H-NMR}$  of 4'-(4-nitrobenzenesulfonamide)-3,4-dihydrochalcone (**5e**).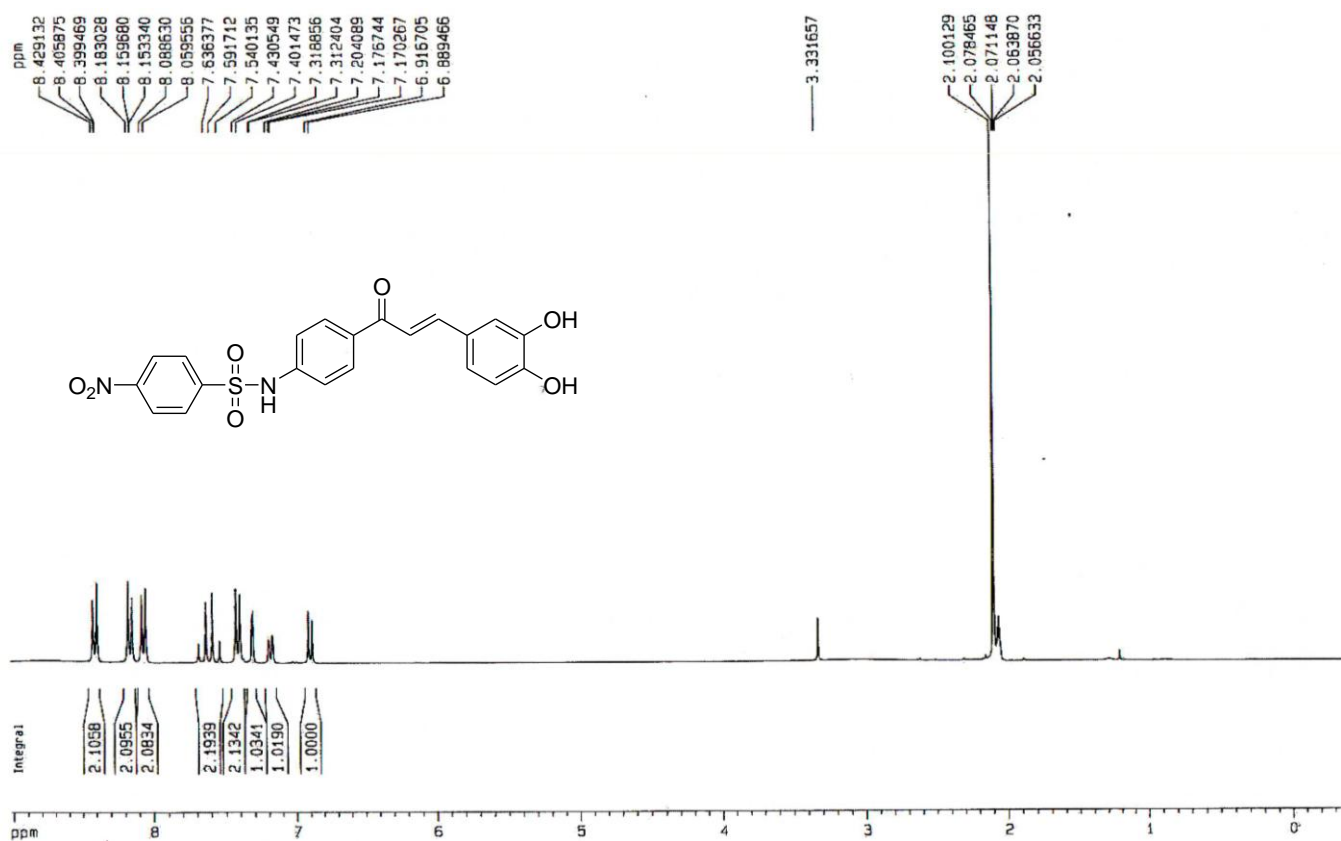**Spectra 30.**  $^{13}\text{C-NMR}$  of 4'-(4-nitrobenzenesulfonamide)-3,4-dihydrochalcone (**5e**).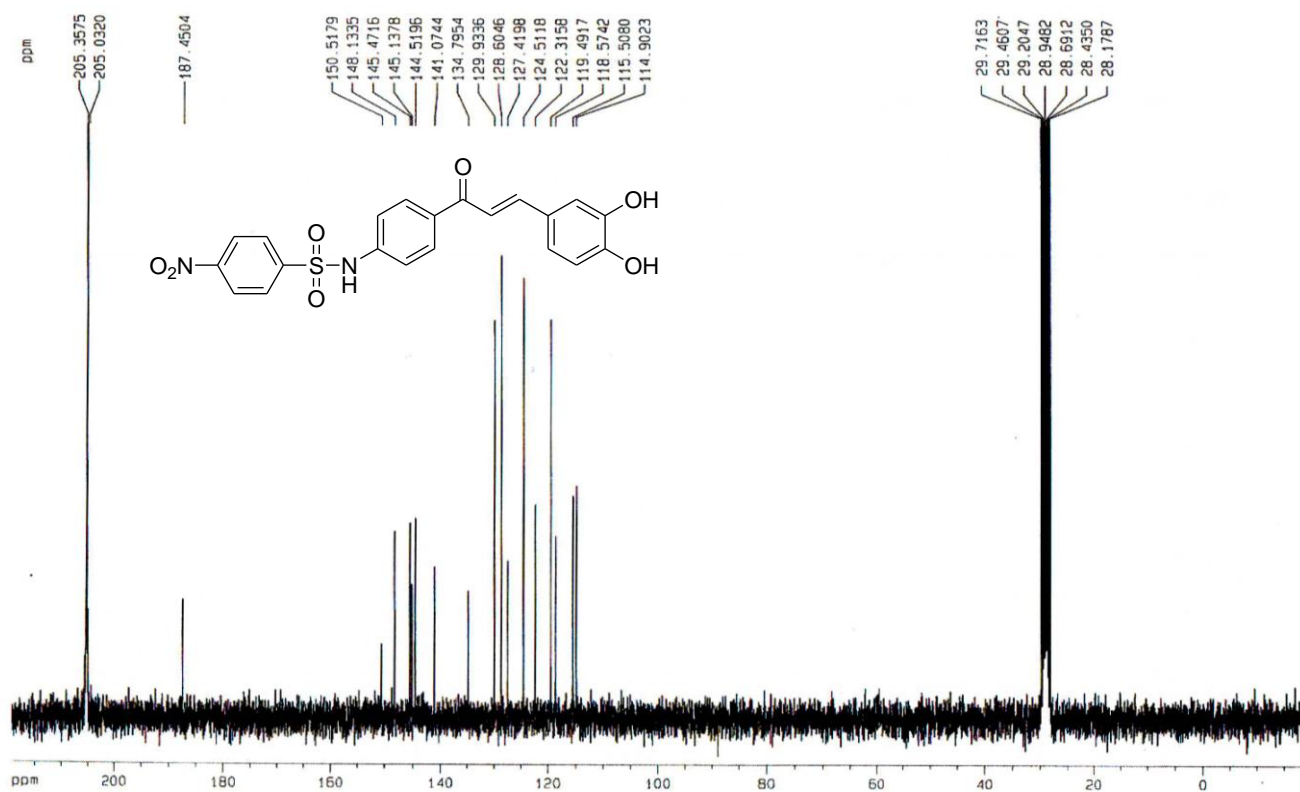



**Spectra 31.**  $^1\text{H-NMR}$  of 4'-(4-fluoroenzenulfonamide)-3,4-dihydroxychalcone (**5f**).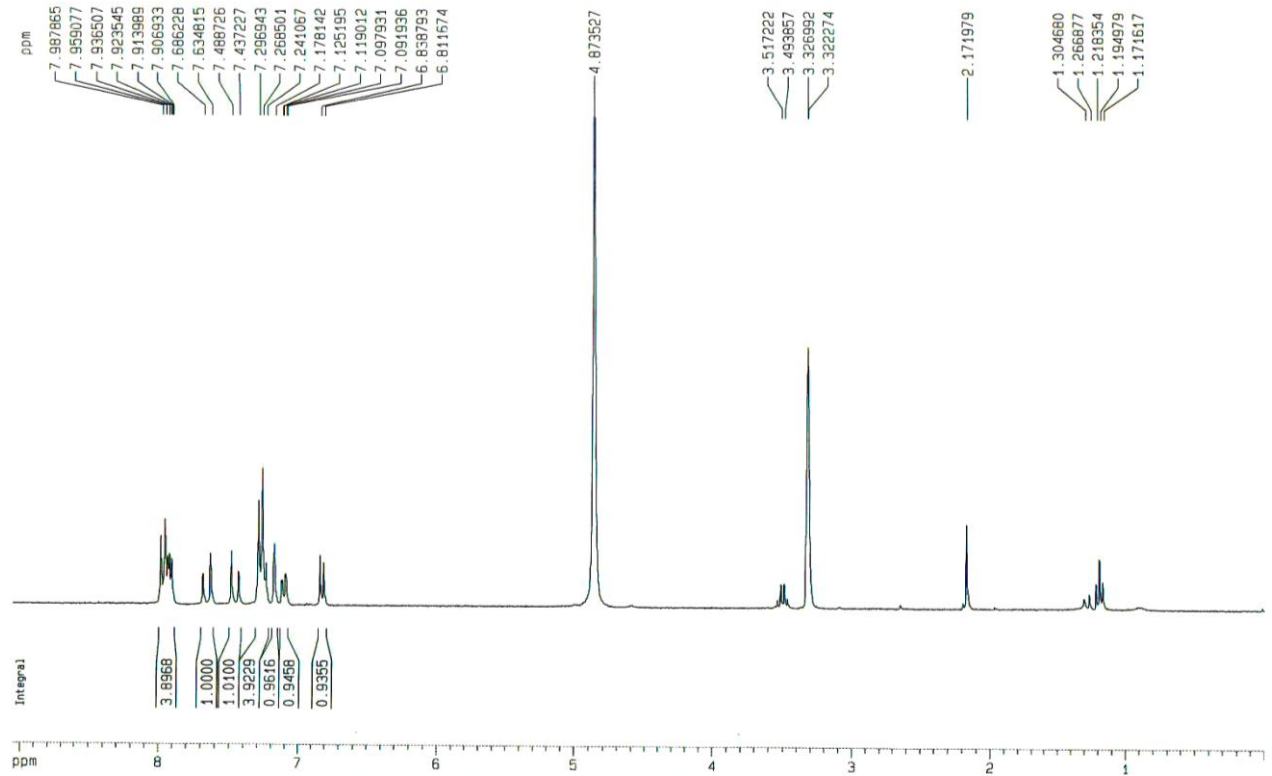**Spectra 32.**  $^1\text{H-NMR}$  of 4'-(*p*-toluenesulfonamide)-2,4-dihydroxychalcone (**6**).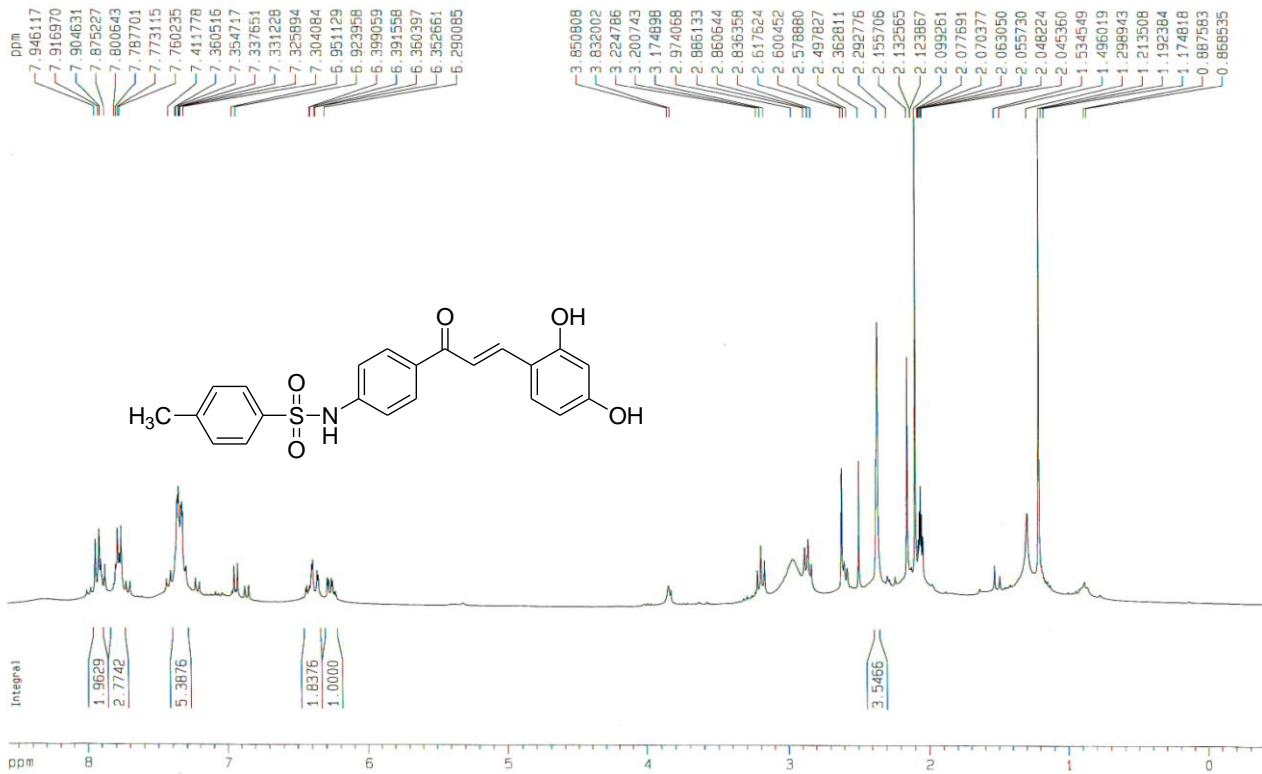

**Spectra 33.**  $^1\text{H-NMR}$  of 4'-(*p*-toluenesulfonamide)-2,5-dihydroxychalcone (7).
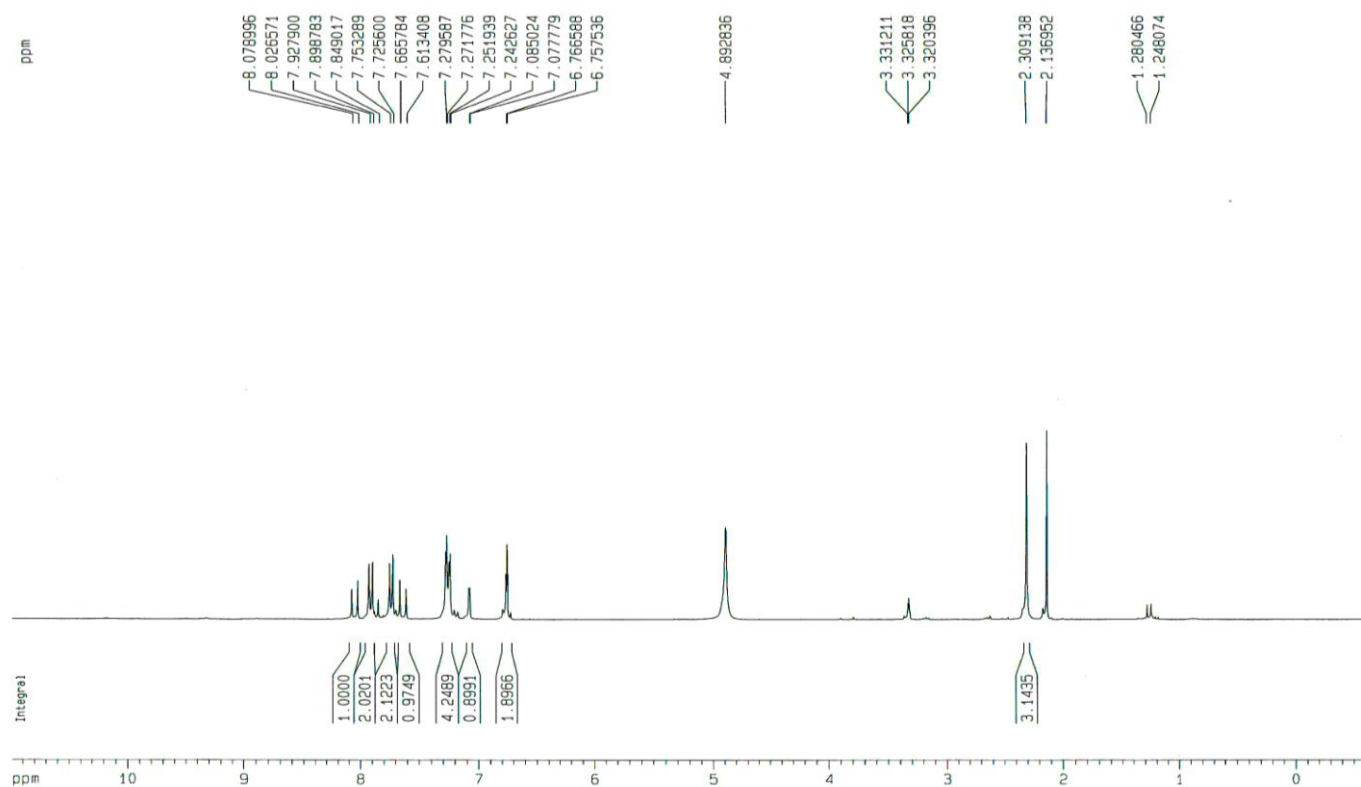
**Spectra 34.**  $^{13}\text{C-NMR}$  of 4'-(*p*-toluenesulfonamide)-2,5-dihydroxychalcone (7).
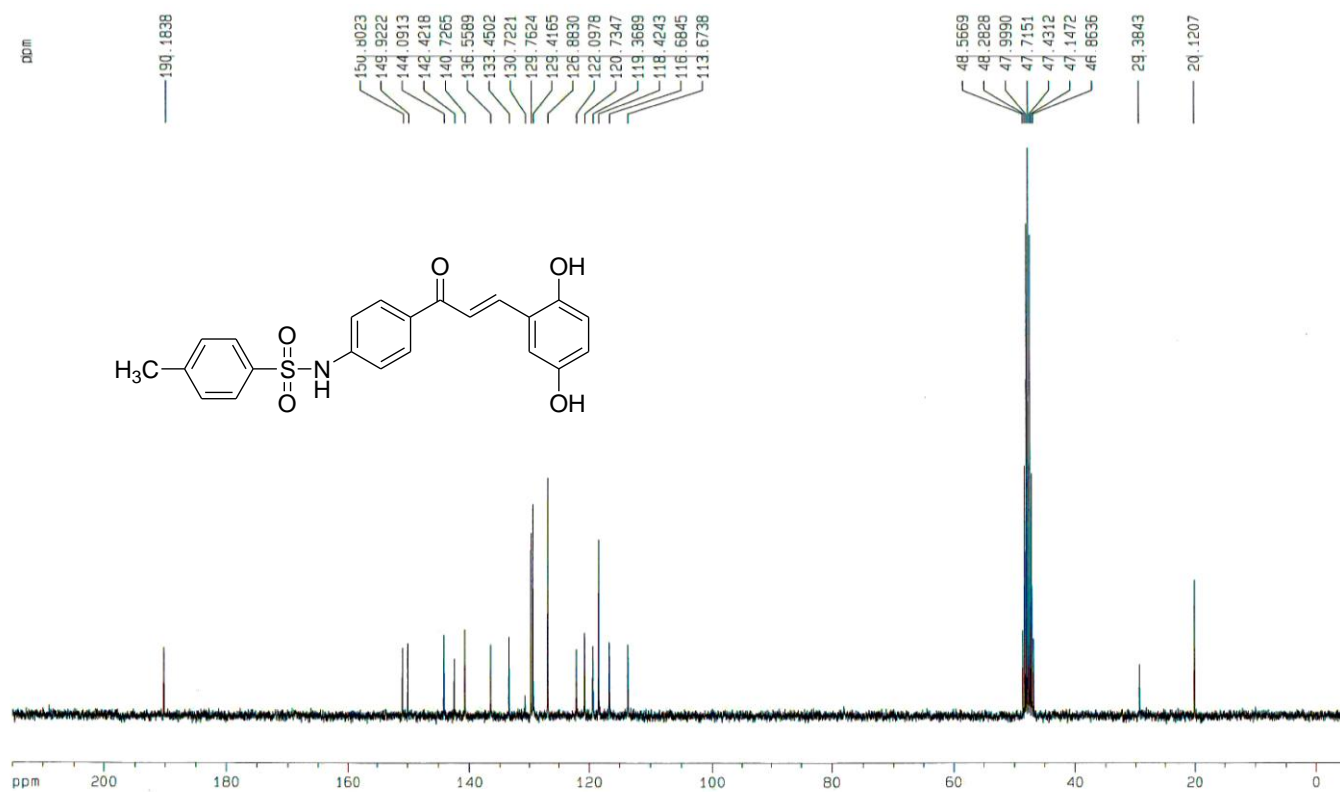

**Figure 1.** Effect of compounds **1**, **2**, **4a,c**, and **5d** on the hydrolytic activity of BACE1.  $K_m$  values as a function of the concentrations of **1**, **2**, **4a,c**, and **5d**. (Inset) Dependence of the values of  $V_{max}$  on the concentration of compounds **1**, **2**, **4a,c**, and **5d**.

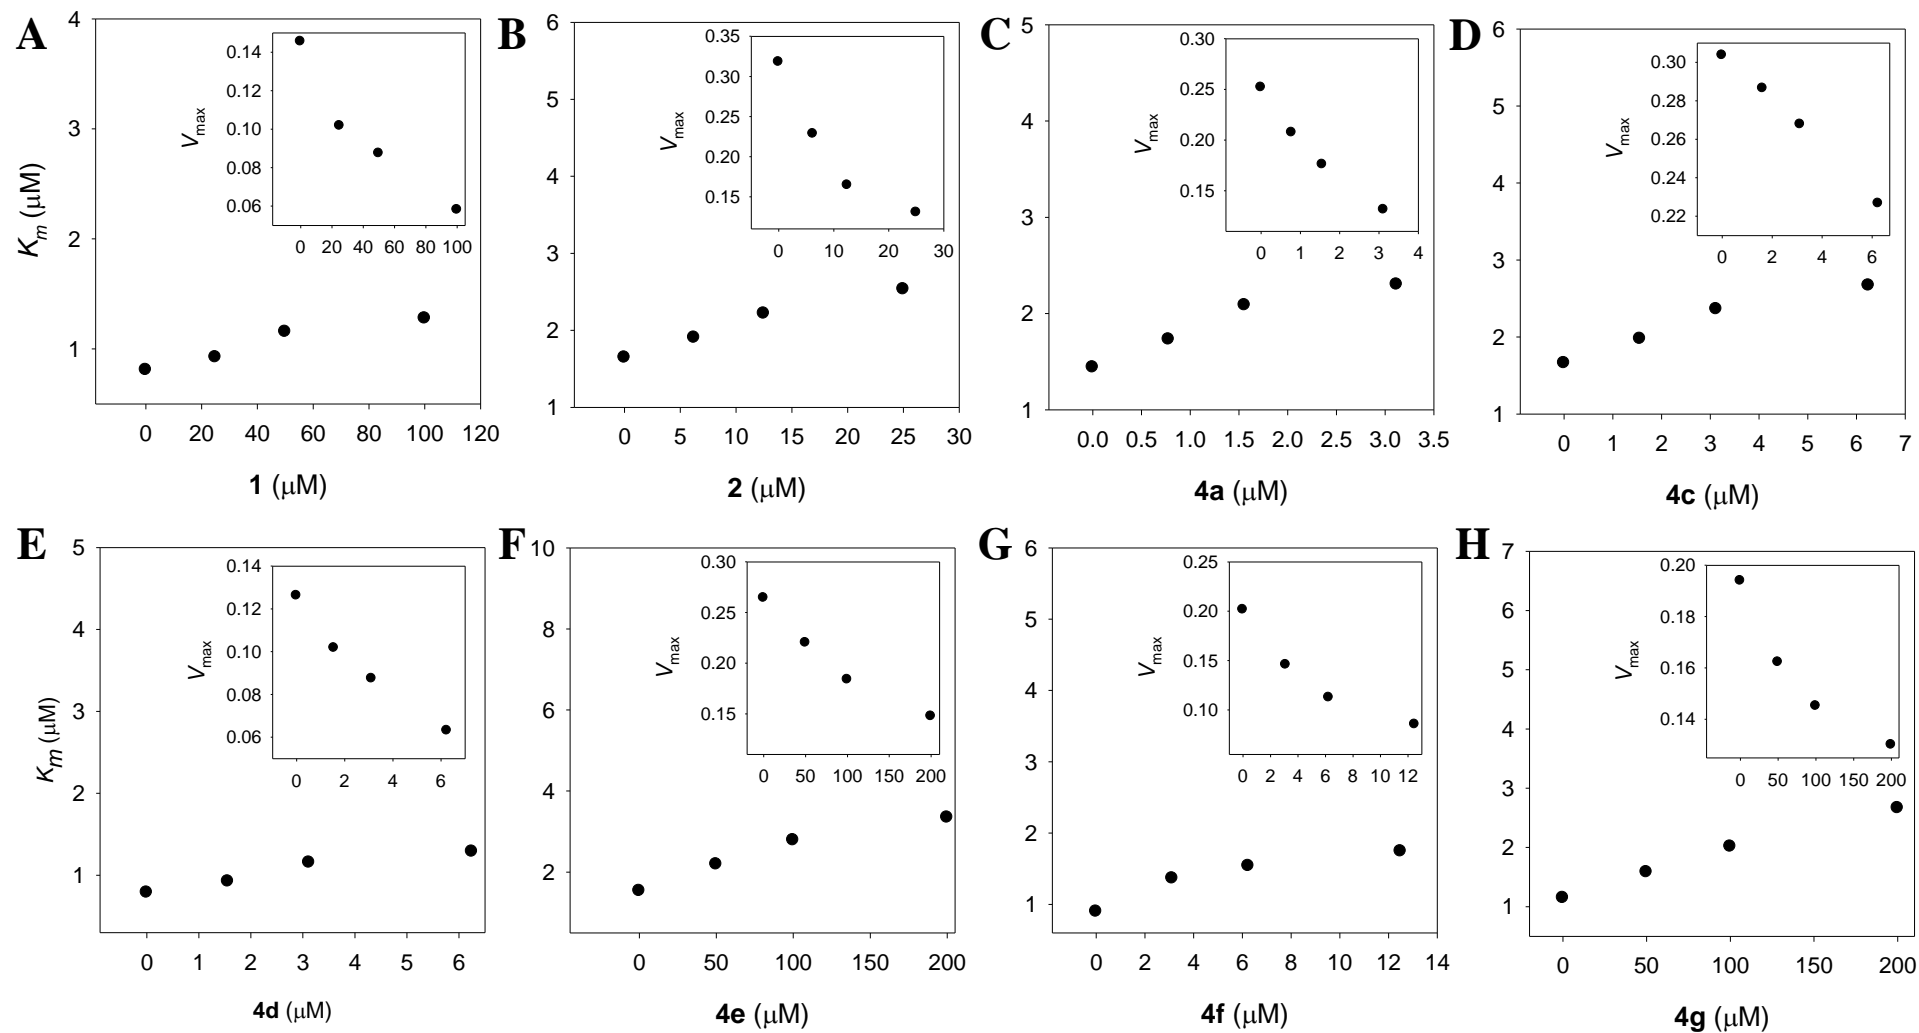

**Figure 2.** Effect of compounds **1**, **2**, **4a,c**, and **5d** on the hydrolytic activity of BACE1. Dixon plots for the inhibition of compounds **1**, **2**, **4a,c**, and **5d** on BACE1 catalyzed proteolysis of substrate.

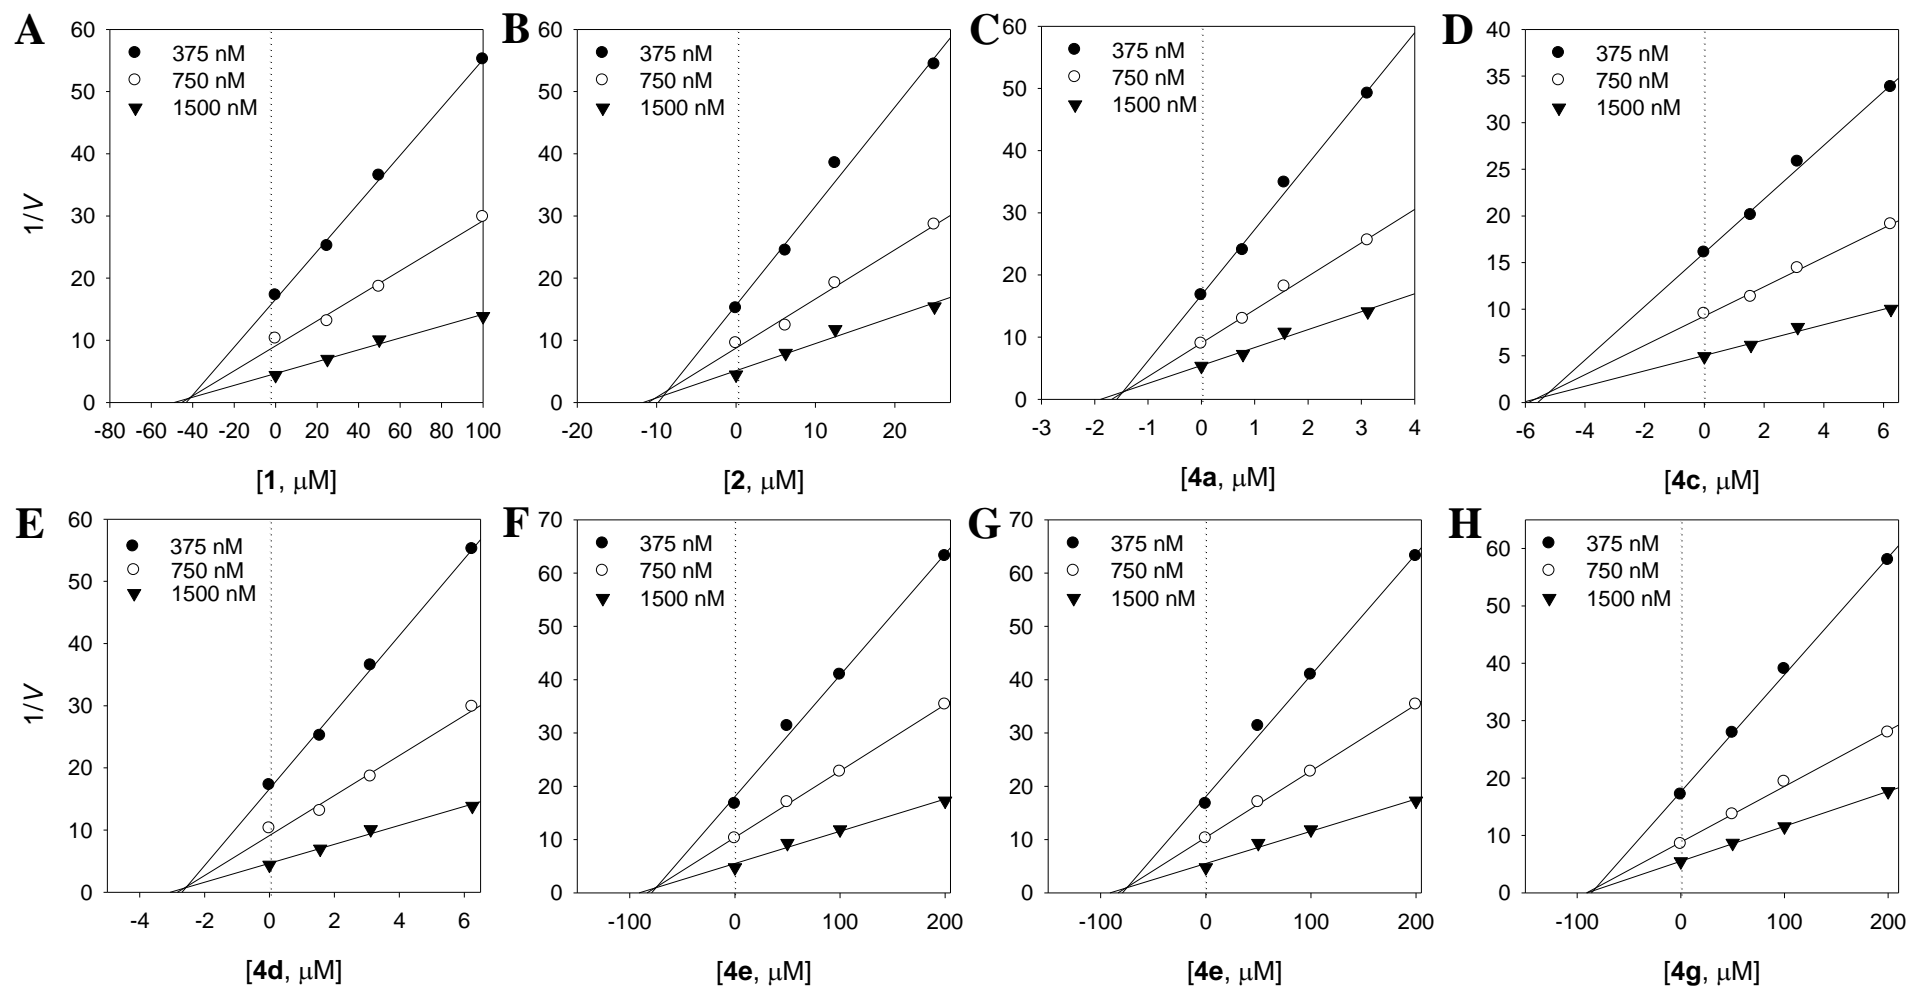

**Figure 3.** Effect of compounds **5a–d** on the hydrolytic activity of BACE1.  $K_m$  values as a function of the concentrations of **5a–d**. (Inset) Dependence of the values of  $V_{max}$  on the concentration of compounds **5a–5d**.

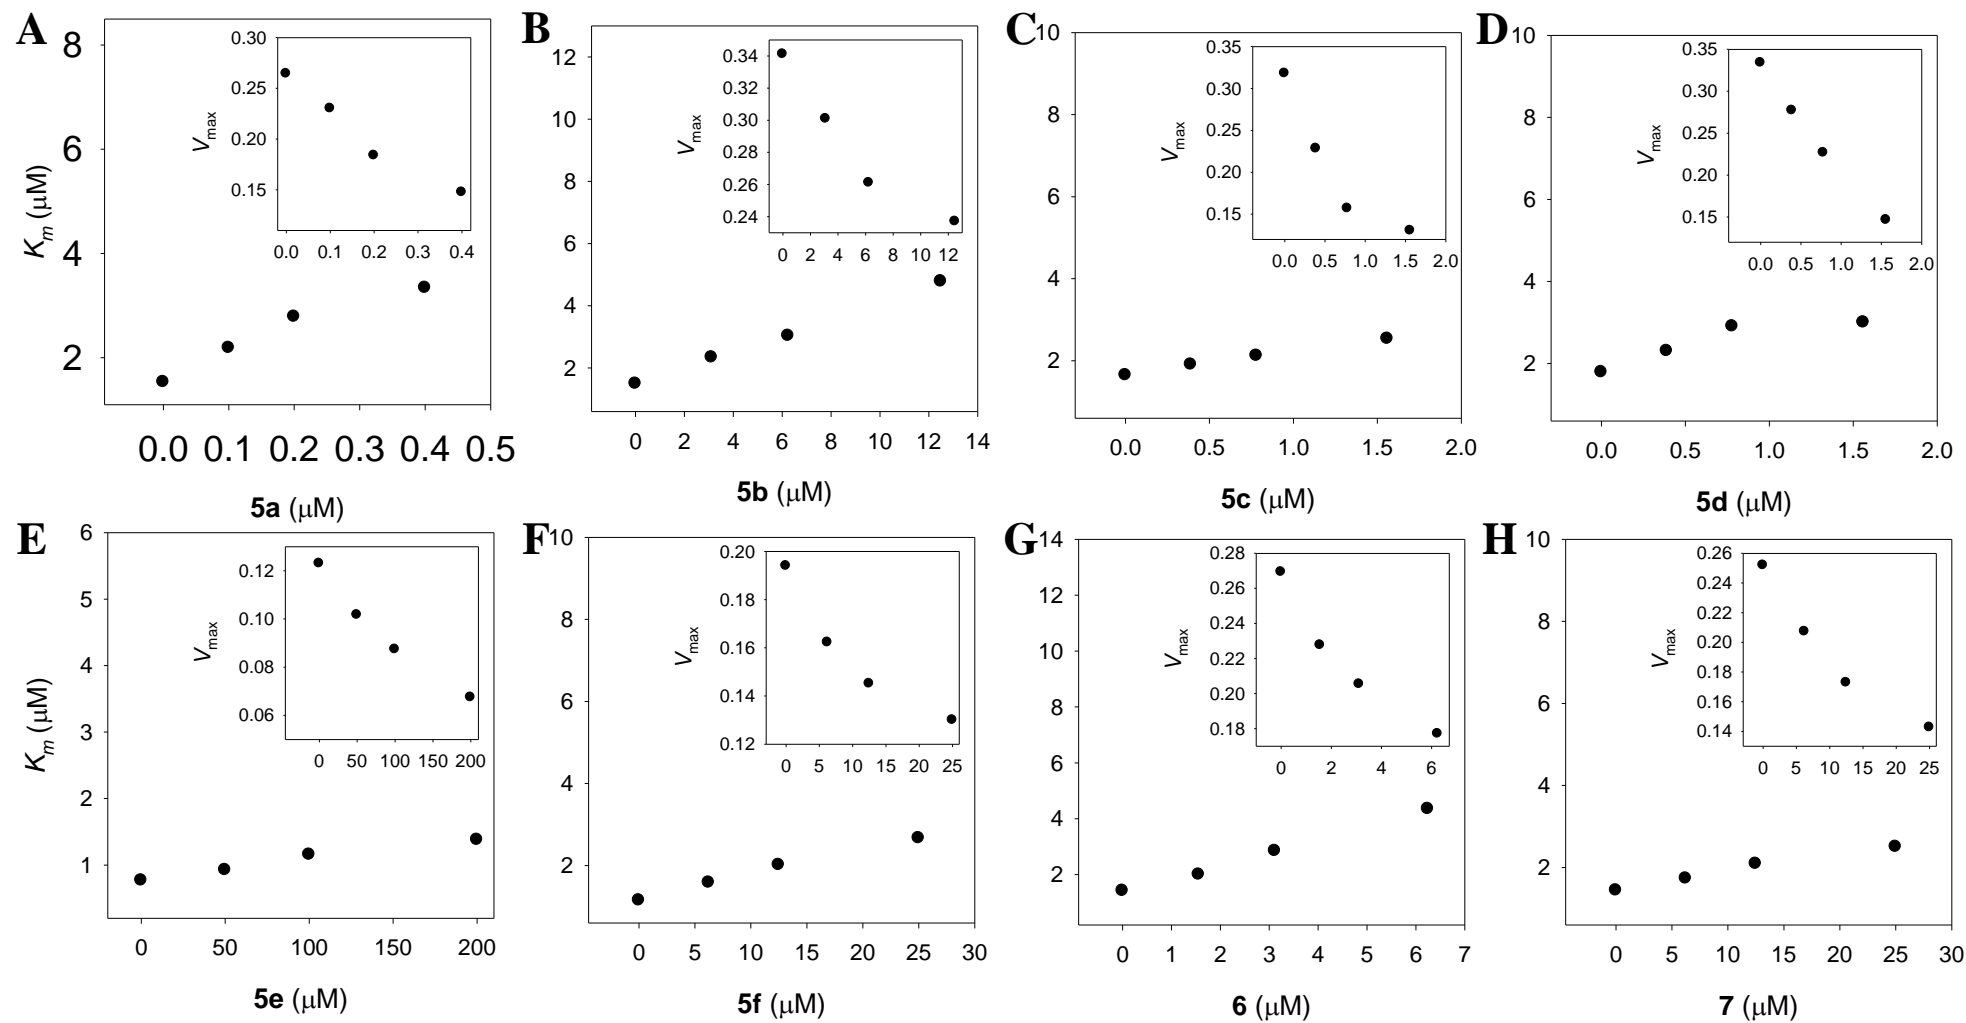

**Figure 4.** Effect of compounds **5a–d** on the hydrolytic activity of BACE1. Dixon plots for the inhibition of compounds **5a–d** on BACE1 catalyzed proteolysis of substrate.

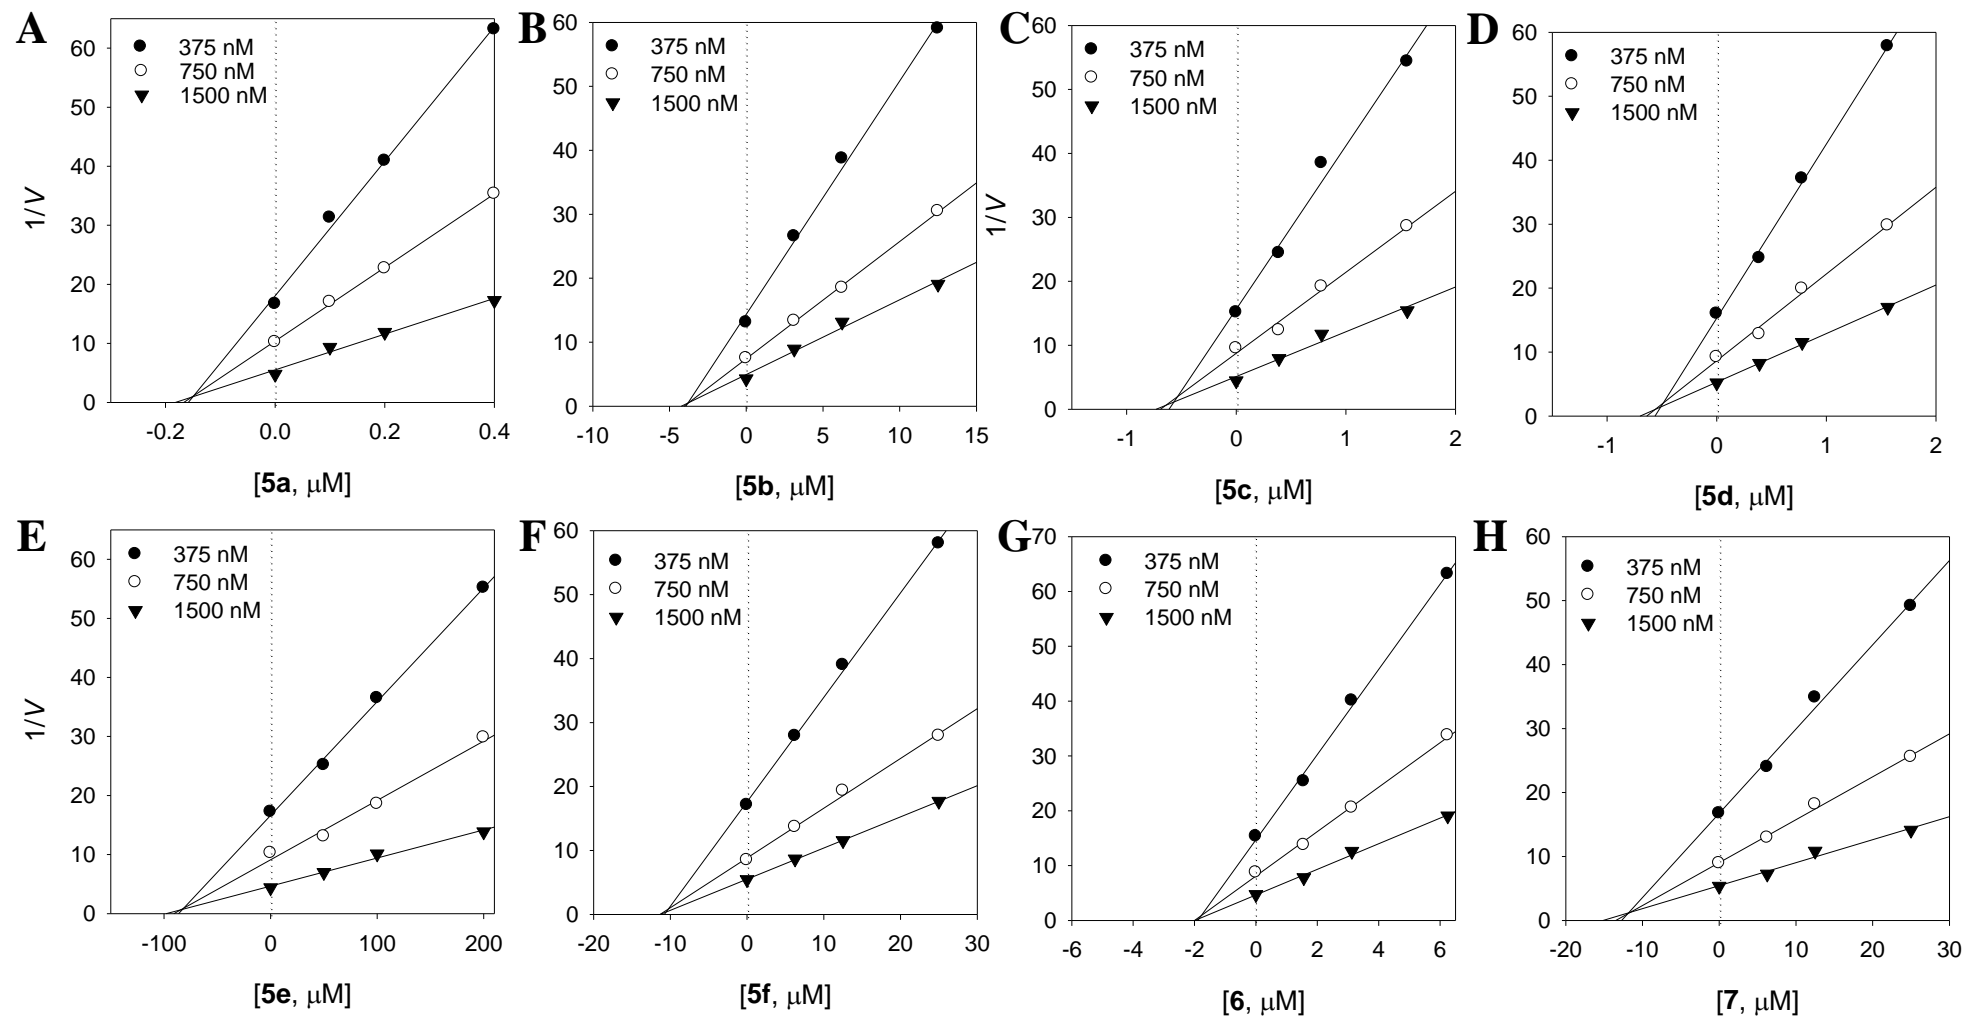

Figure 5. Acetylcholinesterase kinetic data of compounds 4a,f, and 5b,d.

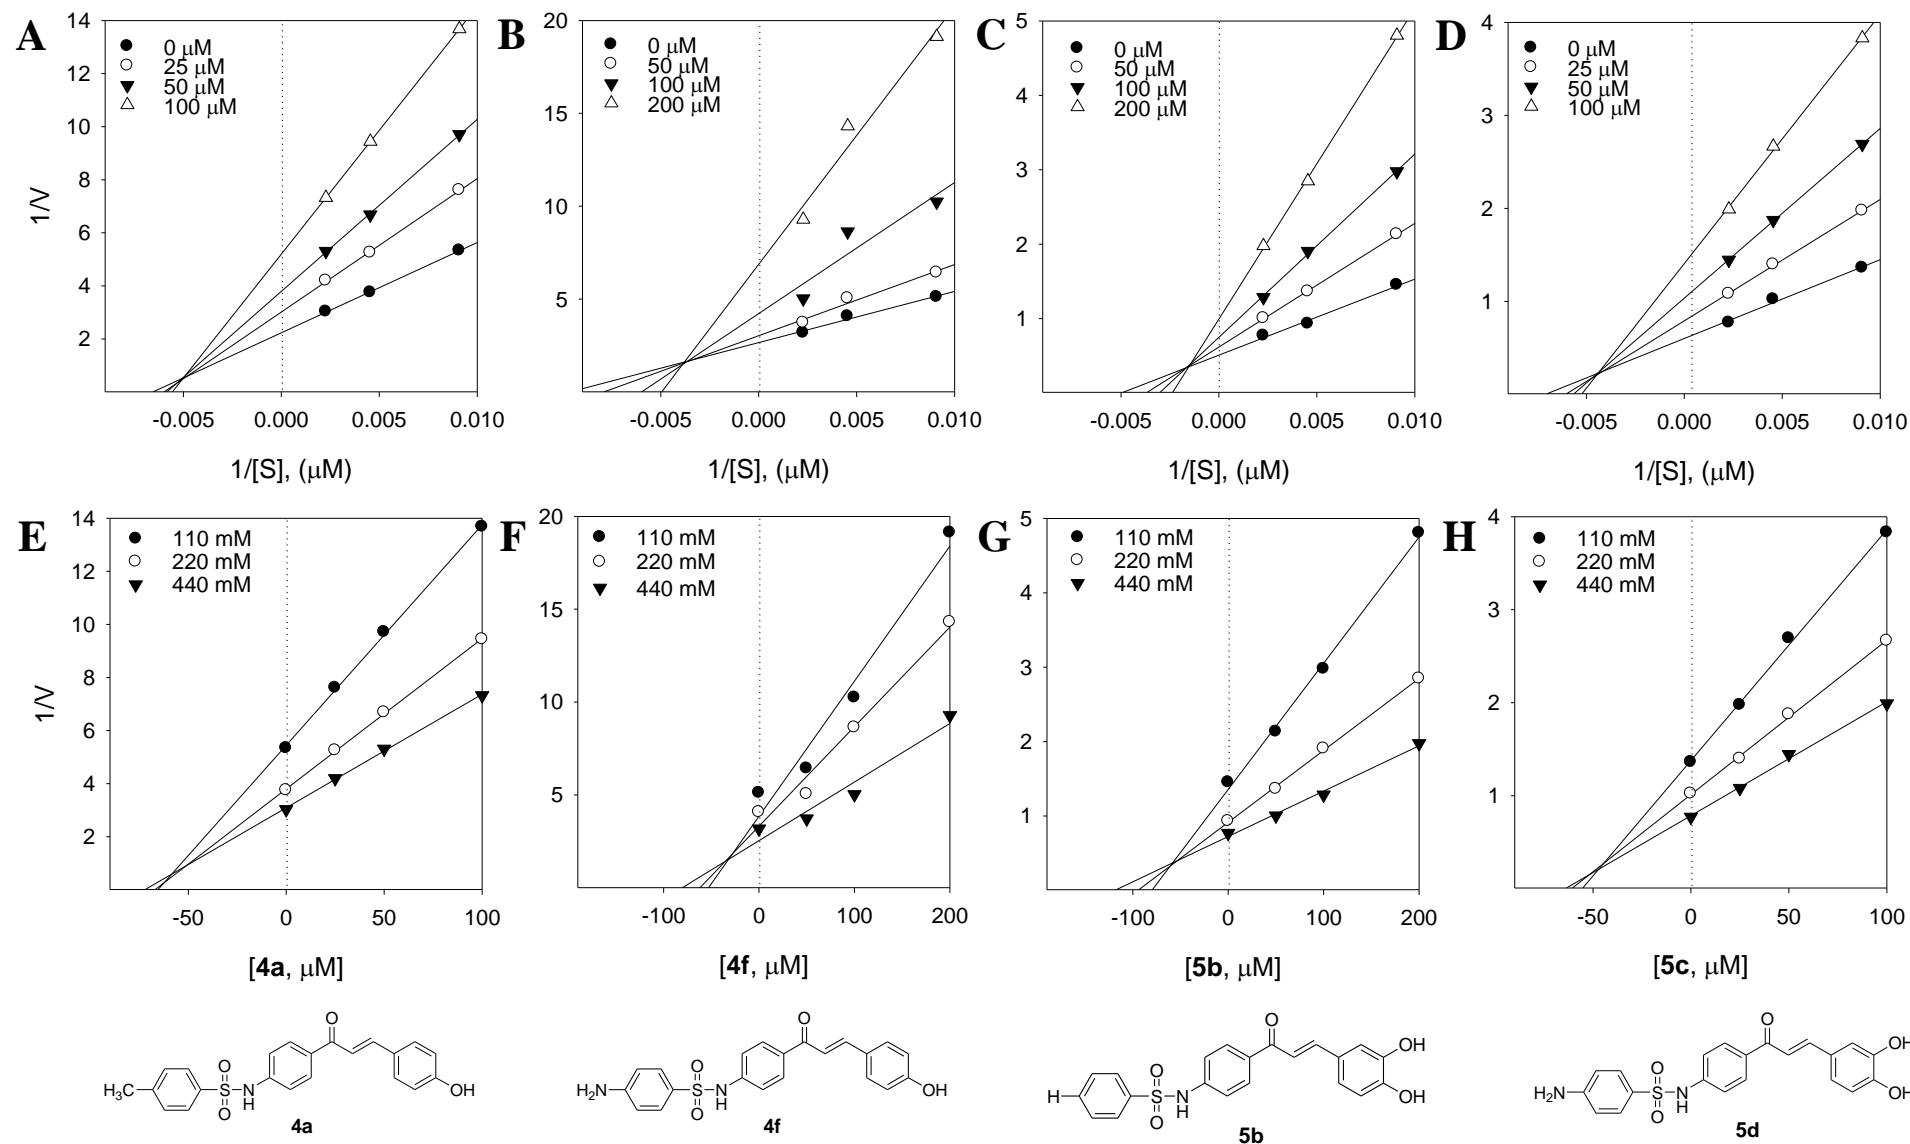

Figure 6. Butyrylcholinesterase kinetic data of compounds 4a,f, and 5b,d.

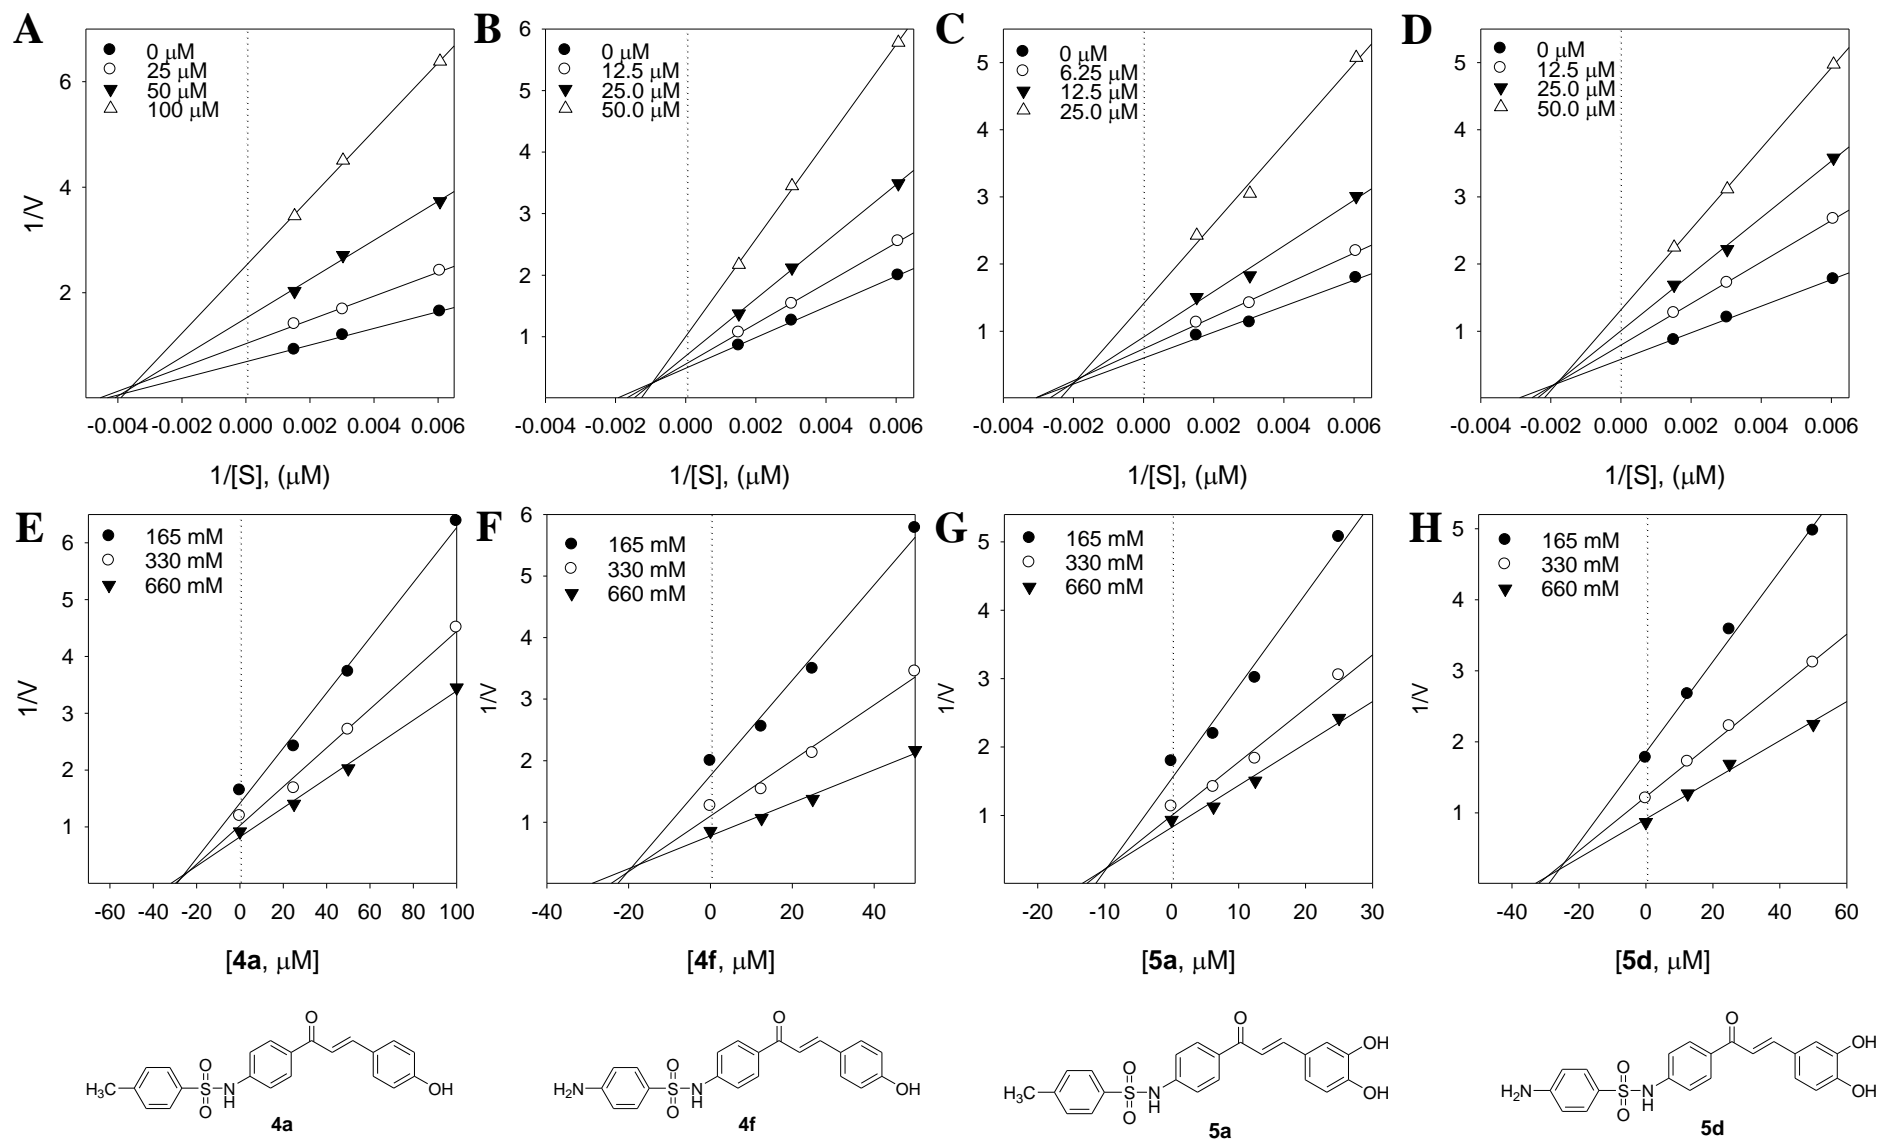

Supplement: molecules-18-00140-s001.pdf [file molecules-18-00140-s001.pdf]
